# Supplementary material for: Identification of Breed-Specific SNPs of Danish Large White Pig in Comparison with Four Chinese Local Pig Breed Genomes
Source: MDPI journal article supplement (doi:10.3390/genes15050623), 2024-05-14
Supplement: s1 [file s1]

supplementary table S2 The annotated genes information of the LW pig breed-specific non-synonymous SNPs

| #chr | start     | end       | structure_type | function_type     | GeneID              |
|------|-----------|-----------|----------------|-------------------|---------------------|
| 1    | 513579    | 513579    | exonic         | nonsynonymous SNV | ENSSSCG00000004010  |
| 1    | 1584076   | 1584076   | exonic         | nonsynonymous SNV | ENSSSCG00000004018  |
| 1    | 1939671   | 1939671   | exonic         | nonsynonymous SNV | ENSSSCG000000027404 |
| 1    | 2204022   | 2204022   | exonic         | nonsynonymous SNV | ENSSSCG00000004022  |
| 1    | 7372173   | 7372173   | exonic         | nonsynonymous SNV | ENSSSCG00000004044  |
| 1    | 9811295   | 9811295   | exonic         | nonsynonymous SNV | ENSSSCG00000004064  |
| 1    | 14046203  | 14046203  | exonic         | nonsynonymous SNV | ENSSSCG00000004082  |
| 1    | 14659837  | 14659837  | exonic         | nonsynonymous SNV | ENSSSCG00000004087  |
| 1    | 16025403  | 16025403  | exonic         | nonsynonymous SNV | ENSSSCG000000032525 |
| 1    | 17314322  | 17314322  | exonic         | nonsynonymous SNV | ENSSSCG000000033175 |
| 1    | 19765552  | 19765552  | exonic         | nonsynonymous SNV | ENSSSCG00000004121  |
| 1    | 25980052  | 25980052  | exonic         | nonsynonymous SNV | ENSSSCG00000004149  |
| 1    | 27051817  | 27051817  | exonic         | nonsynonymous SNV | ENSSSCG00000004156  |
| 1    | 27088970  | 27088970  | exonic         | nonsynonymous SNV | ENSSSCG00000004158  |
| 1    | 27769438  | 27769438  | exonic         | nonsynonymous SNV | ENSSSCG000000039049 |
| 1    | 27918948  | 27918948  | exonic         | nonsynonymous SNV | ENSSSCG00000004164  |
| 1    | 30988145  | 30988145  | exonic         | nonsynonymous SNV | ENSSSCG00000004180  |
| 1    | 33815915  | 33815915  | exonic         | nonsynonymous SNV | ENSSSCG00000004207  |
| 1    | 34074109  | 34074109  | exonic         | nonsynonymous SNV | ENSSSCG000000042942 |
| 1    | 35766902  | 35766902  | exonic         | nonsynonymous SNV | ENSSSCG00000004215  |
| 1    | 45268688  | 45268688  | exonic         | nonsynonymous SNV | ENSSSCG000000035259 |
| 1    | 45293307  | 45293307  | exonic         | nonsynonymous SNV | ENSSSCG000000029003 |
| 1    | 56689242  | 56689242  | exonic         | nonsynonymous SNV | ENSSSCG00000004342  |
| 1    | 64044670  | 64044670  | exonic         | nonsynonymous SNV | ENSSSCG000000037612 |
| 1    | 71295145  | 71295145  | exonic         | nonsynonymous SNV | ENSSSCG00000004412  |
| 1    | 75516347  | 75516347  | exonic         | nonsynonymous SNV | ENSSSCG00000004405  |
| 1    | 75791406  | 75791406  | exonic         | nonsynonymous SNV | ENSSSCG00000004460  |
| 1    | 84009167  | 84009167  | exonic         | nonsynonymous SNV | ENSSSCG00000004521  |
| 1    | 100345971 | 100345971 | exonic         | nonsynonymous SNV | ENSSSCG00000004823  |
| 1    | 139542207 | 139542207 | exonic         | nonsynonymous SNV | ENSSSCG00000004847  |
| 1    | 143980510 | 143980510 | exonic         | nonsynonymous SNV | ENSSSCG00000004885  |
| 1    | 155727821 | 155727821 | exonic         | nonsynonymous SNV | ENSSSCG00000004929  |
| 1    | 163303116 | 163303116 | exonic         | nonsynonymous SNV | ENSSSCG00000004941  |
| 1    | 164337095 | 164337095 | exonic         | nonsynonymous SNV | ENSSSCG00000004957  |
| 1    | 166125890 | 166125890 | exonic         | nonsynonymous SNV | ENSSSCG00000004973  |
| 1    | 168390459 | 168390459 | exonic         | nonsynonymous SNV | ENSSSCG000000061989 |
| 1    | 174732987 | 174732987 | exonic         | nonsynonymous SNV | ENSSSCG00000004999  |
| 1    | 174733451 | 174733451 | exonic         | nonsynonymous SNV | ENSSSCG00000005004  |
| 1    | 175404585 | 175404585 | exonic         | nonsynonymous SNV | ENSSSCG00000005068  |
| 1    | 179469474 | 179469474 | exonic         | nonsynonymous SNV | ENSSSCG000000032928 |
| 1    | 186713033 | 186713033 | exonic         | nonsynonymous SNV | ENSSSCG00000005081  |
| 1    | 188581636 | 188581636 | exonic         | nonsynonymous SNV | ENSSSCG00000005101  |

|   |           |           |        |                   |                    |
|---|-----------|-----------|--------|-------------------|--------------------|
| 1 | 188582115 | 188582115 | exonic | nonsynonymous SNV | ENSSSCG00000060359 |
| 1 | 189017515 | 189017515 | exonic | nonsynonymous SNV | ENSSSCG00000033910 |
| 1 | 191102327 | 191102327 | exonic | nonsynonymous SNV | ENSSSCG00000028406 |
| 1 | 201342852 | 201342852 | exonic | nonsynonymous SNV | ENSSSCG00000005169 |
| 1 | 201623993 | 201623993 | exonic | nonsynonymous SNV | ENSSSCG00000005170 |
| 1 | 202026738 | 202026738 | exonic | nonsynonymous SNV | ENSSSCG00000005282 |
| 1 | 203446086 | 203446086 | exonic | nonsynonymous SNV | ENSSSCG00000037497 |
| 1 | 203484898 | 203484898 | exonic | nonsynonymous SNV | ENSSSCG00000005305 |
| 1 | 230214368 | 230214368 | exonic | nonsynonymous SNV | ENSSSCG00000005313 |
| 1 | 234580261 | 234580261 | exonic | nonsynonymous SNV | ENSSSCG00000048089 |
| 1 | 236051469 | 236051469 | exonic | nonsynonymous SNV | ENSSSCG00000005350 |
| 1 | 236383330 | 236383330 | exonic | nonsynonymous SNV | ENSSSCG00000005449 |
| 1 | 236728434 | 236728434 | exonic | nonsynonymous SNV | ENSSSCG00000005459 |
| 1 | 238251083 | 238251083 | exonic | nonsynonymous SNV | ENSSSCG00000020987 |
| 1 | 250462750 | 250462750 | exonic | nonsynonymous SNV | ENSSSCG00000005487 |
| 1 | 252231066 | 252231066 | exonic | nonsynonymous SNV | ENSSSCG00000005494 |
| 1 | 253953545 | 253953545 | exonic | nonsynonymous SNV | ENSSSCG00000005524 |
| 1 | 254849366 | 254849366 | exonic | nonsynonymous SNV | ENSSSCG00000031440 |
| 1 | 255596979 | 255596979 | exonic | nonsynonymous SNV | ENSSSCG00000031426 |
| 1 | 261756783 | 261756783 | exonic | nonsynonymous SNV | ENSSSCG00000005625 |
| 1 | 266381998 | 266381998 | exonic | nonsynonymous SNV | ENSSSCG00000005623 |
| 1 | 267460116 | 267460116 | exonic | nonsynonymous SNV | ENSSSCG00000005628 |
| 1 | 268315026 | 268315026 | exonic | nonsynonymous SNV | ENSSSCG00000005636 |
| 1 | 268382480 | 268382480 | exonic | nonsynonymous SNV | ENSSSCG00000005652 |
| 1 | 268392391 | 268392391 | exonic | nonsynonymous SNV | ENSSSCG00000063201 |
| 1 | 268561034 | 268561034 | exonic | nonsynonymous SNV | ENSSSCG00000005669 |
| 1 | 268906624 | 268906624 | exonic | nonsynonymous SNV | ENSSSCG00000005671 |
| 1 | 269084784 | 269084784 | exonic | nonsynonymous SNV | ENSSSCG00000005672 |
| 1 | 269338162 | 269338162 | exonic | nonsynonymous SNV | ENSSSCG00000005711 |
| 1 | 269391399 | 269391399 | exonic | nonsynonymous SNV | ENSSSCG00000035964 |
| 1 | 269419092 | 269419092 | exonic | nonsynonymous SNV | ENSSSCG00000005751 |
| 1 | 271173606 | 271173606 | exonic | nonsynonymous SNV | ENSSSCG00000014559 |
| 1 | 272890445 | 272890445 | exonic | nonsynonymous SNV | ENSSSCG00000032010 |
| 1 | 274082798 | 274082798 | exonic | nonsynonymous SNV | ENSSSCG00000012835 |
| 2 | 71478     | 71478     | exonic | nonsynonymous SNV | ENSSSCG00000033382 |
| 2 | 283624    | 283624    | exonic | nonsynonymous SNV | ENSSSCG00000032911 |
| 2 | 649282    | 649282    | exonic | nonsynonymous SNV | ENSSSCG00000023537 |
| 2 | 762699    | 762699    | exonic | nonsynonymous SNV | ENSSSCG00000036244 |
| 2 | 763773    | 763773    | exonic | nonsynonymous SNV | ENSSSCG00000029902 |
| 2 | 764150    | 764150    | exonic | nonsynonymous SNV | ENSSSCG00000038508 |
| 2 | 765196    | 765196    | exonic | nonsynonymous SNV | ENSSSCG00000021891 |
| 2 | 1015139   | 1015139   | exonic | nonsynonymous SNV | ENSSSCG00000012959 |
| 2 | 1248654   | 1248654   | exonic | nonsynonymous SNV | ENSSSCG00000012992 |
| 2 | 1292950   | 1292950   | exonic | nonsynonymous SNV | ENSSSCG00000039740 |

|   |          |          |        |                   |                    |
|---|----------|----------|--------|-------------------|--------------------|
| 2 | 5623657  | 5623657  | exonic | nonsynonymous SNV | ENSSSCG00000013025 |
| 2 | 5719936  | 5719936  | exonic | nonsynonymous SNV | ENSSSCG00000013056 |
| 2 | 5720404  | 5720404  | exonic | nonsynonymous SNV | ENSSSCG00000028025 |
| 2 | 5881323  | 5881323  | exonic | nonsynonymous SNV | ENSSSCG00000022866 |
| 2 | 6313235  | 6313235  | exonic | nonsynonymous SNV | ENSSSCG00000055375 |
| 2 | 6827155  | 6827155  | exonic | nonsynonymous SNV | ENSSSCG00000021906 |
| 2 | 7063052  | 7063052  | exonic | nonsynonymous SNV | ENSSSCG00000058512 |
| 2 | 7063976  | 7063976  | exonic | nonsynonymous SNV | ENSSSCG00000013090 |
| 2 | 7561368  | 7561368  | exonic | nonsynonymous SNV | ENSSSCG00000026060 |
| 2 | 8472694  | 8472694  | exonic | nonsynonymous SNV | ENSSSCG00000062785 |
| 2 | 8933990  | 8933990  | exonic | nonsynonymous SNV | ENSSSCG00000013098 |
| 2 | 8975511  | 8975511  | exonic | nonsynonymous SNV | ENSSSCG00000013111 |
| 2 | 9206796  | 9206796  | exonic | nonsynonymous SNV | ENSSSCG00000022114 |
| 2 | 9206797  | 9206797  | exonic | nonsynonymous SNV | ENSSSCG00000013102 |
| 2 | 9983789  | 9983789  | exonic | nonsynonymous SNV | ENSSSCG00000013119 |
| 2 | 10342895 | 10342895 | exonic | nonsynonymous SNV | ENSSSCG00000013174 |
| 2 | 10342910 | 10342910 | exonic | nonsynonymous SNV | ENSSSCG00000031326 |
| 2 | 10431337 | 10431337 | exonic | nonsynonymous SNV | ENSSSCG00000052696 |
| 2 | 10433102 | 10433102 | exonic | nonsynonymous SNV | ENSSSCG00000054225 |
| 2 | 10448367 | 10448367 | exonic | nonsynonymous SNV | ENSSSCG00000013231 |
| 2 | 10542472 | 10542472 | exonic | nonsynonymous SNV | ENSSSCG00000013239 |
| 2 | 10542474 | 10542474 | exonic | nonsynonymous SNV | ENSSSCG00000013245 |
| 2 | 10596783 | 10596783 | exonic | nonsynonymous SNV | ENSSSCG00000013252 |
| 2 | 10752002 | 10752002 | exonic | nonsynonymous SNV | ENSSSCG00000028338 |
| 2 | 11271143 | 11271143 | exonic | nonsynonymous SNV | ENSSSCG00000013297 |
| 2 | 11310092 | 11310092 | exonic | nonsynonymous SNV | ENSSSCG00000013301 |
| 2 | 11740637 | 11740637 | exonic | nonsynonymous SNV | ENSSSCG00000013302 |
| 2 | 13159464 | 13159464 | exonic | nonsynonymous SNV | ENSSSCG00000013318 |
| 2 | 13545351 | 13545351 | exonic | nonsynonymous SNV | ENSSSCG00000013326 |
| 2 | 14216016 | 14216016 | exonic | nonsynonymous SNV | ENSSSCG00000013377 |
| 2 | 14444951 | 14444951 | exonic | nonsynonymous SNV | ENSSSCG00000031706 |
| 2 | 15025962 | 15025962 | exonic | nonsynonymous SNV | ENSSSCG00000038176 |
| 2 | 15180606 | 15180606 | exonic | nonsynonymous SNV | ENSSSCG00000034569 |
| 2 | 15397558 | 15397558 | exonic | nonsynonymous SNV | ENSSSCG00000044276 |
| 2 | 15813707 | 15813707 | exonic | nonsynonymous SNV | ENSSSCG00000035155 |
| 2 | 25590589 | 25590589 | exonic | nonsynonymous SNV | ENSSSCG00000055945 |
| 2 | 25825459 | 25825459 | exonic | nonsynonymous SNV | ENSSSCG00000056866 |
| 2 | 26464759 | 26464759 | exonic | nonsynonymous SNV | ENSSSCG00000013941 |
| 2 | 26496799 | 26496799 | exonic | nonsynonymous SNV | ENSSSCG00000053785 |
| 2 | 28709296 | 28709296 | exonic | nonsynonymous SNV | ENSSSCG00000013895 |
| 2 | 29721336 | 29721336 | exonic | nonsynonymous SNV | ENSSSCG00000041467 |
| 2 | 29755069 | 29755069 | exonic | nonsynonymous SNV | ENSSSCG00000027013 |
| 2 | 41621454 | 41621454 | exonic | nonsynonymous SNV | ENSSSCG00000026780 |
| 2 | 41640439 | 41640439 | exonic | nonsynonymous SNV | ENSSSCG00000014163 |

|   |           |           |        |                   |                     |
|---|-----------|-----------|--------|-------------------|---------------------|
| 2 | 47139985  | 47139985  | exonic | nonsynonymous SNV | ENSSSCG000000026175 |
| 2 | 50070281  | 50070281  | exonic | nonsynonymous SNV | ENSSSCG000000014140 |
| 2 | 51324672  | 51324672  | exonic | nonsynonymous SNV | ENSSSCG000000014168 |
| 2 | 51524050  | 51524050  | exonic | nonsynonymous SNV | ENSSSCG000000014173 |
| 2 | 53209726  | 53209726  | exonic | nonsynonymous SNV | ENSSSCG000000014179 |
| 2 | 53594845  | 53594845  | exonic | nonsynonymous SNV | ENSSSCG000000014203 |
| 2 | 54215116  | 54215116  | exonic | nonsynonymous SNV | ENSSSCG000000022048 |
| 2 | 55135176  | 55135176  | exonic | nonsynonymous SNV | ENSSSCG000000014207 |
| 2 | 56862319  | 56862319  | exonic | nonsynonymous SNV | ENSSSCG000000022402 |
| 2 | 57689721  | 57689721  | exonic | nonsynonymous SNV | ENSSSCG000000014247 |
| 2 | 59655034  | 59655034  | exonic | nonsynonymous SNV | ENSSSCG000000014258 |
| 2 | 60314962  | 60314962  | exonic | nonsynonymous SNV | ENSSSCG000000038953 |
| 2 | 61904610  | 61904610  | exonic | nonsynonymous SNV | ENSSSCG000000014303 |
| 2 | 92126807  | 92126807  | exonic | nonsynonymous SNV | ENSSSCG000000026106 |
| 2 | 101368612 | 101368612 | exonic | nonsynonymous SNV | ENSSSCG000000023691 |
| 2 | 102014302 | 102014302 | exonic | nonsynonymous SNV | ENSSSCG000000014335 |
| 2 | 102223248 | 102223248 | exonic | nonsynonymous SNV | ENSSSCG000000014339 |
| 2 | 102552442 | 102552442 | exonic | nonsynonymous SNV | ENSSSCG000000014362 |
| 2 | 103604579 | 103604579 | exonic | nonsynonymous SNV | ENSSSCG000000029281 |
| 2 | 103605668 | 103605668 | exonic | nonsynonymous SNV | ENSSSCG000000027371 |
| 2 | 106555639 | 106555639 | exonic | nonsynonymous SNV | ENSSSCG000000056350 |
| 2 | 116718140 | 116718140 | exonic | nonsynonymous SNV | ENSSSCG000000014410 |
| 2 | 116846708 | 116846708 | exonic | nonsynonymous SNV | ENSSSCG000000014408 |
| 2 | 116878963 | 116878963 | exonic | nonsynonymous SNV | ENSSSCG000000014415 |
| 2 | 116918379 | 116918379 | exonic | nonsynonymous SNV | ENSSSCG000000039045 |
| 2 | 129590514 | 129590514 | exonic | nonsynonymous SNV | ENSSSCG000000014440 |
| 2 | 129706595 | 129706595 | exonic | nonsynonymous SNV | ENSSSCG000000014441 |
| 2 | 131867531 | 131867531 | exonic | nonsynonymous SNV | ENSSSCG000000014450 |
| 2 | 136661695 | 136661695 | exonic | nonsynonymous SNV | ENSSSCG000000032731 |
| 2 | 136827593 | 136827593 | exonic | nonsynonymous SNV | ENSSSCG000000021427 |
| 2 | 137078685 | 137078685 | exonic | nonsynonymous SNV | ENSSSCG000000056671 |
| 2 | 140328000 | 140328000 | exonic | nonsynonymous SNV | ENSSSCG000000007563 |
| 2 | 140425725 | 140425725 | exonic | nonsynonymous SNV | ENSSSCG000000007577 |
| 2 | 140682816 | 140682816 | exonic | nonsynonymous SNV | ENSSSCG000000007575 |
| 2 | 142114567 | 142114567 | exonic | nonsynonymous SNV | ENSSSCG000000022553 |
| 2 | 142578901 | 142578901 | exonic | nonsynonymous SNV | ENSSSCG000000008665 |
| 2 | 143132761 | 143132761 | exonic | nonsynonymous SNV | ENSSSCG000000037070 |
| 2 | 143136656 | 143136656 | exonic | nonsynonymous SNV | ENSSSCG000000027288 |
| 2 | 144463018 | 144463018 | exonic | nonsynonymous SNV | ENSSSCG000000035090 |
| 2 | 147350505 | 147350505 | exonic | nonsynonymous SNV | ENSSSCG000000032705 |
| 2 | 147453830 | 147453830 | exonic | nonsynonymous SNV | ENSSSCG000000007599 |
| 2 | 147856747 | 147856747 | exonic | nonsynonymous SNV | ENSSSCG000000007602 |
| 2 | 151018088 | 151018088 | exonic | nonsynonymous SNV | ENSSSCG000000035534 |
| 2 | 151018499 | 151018499 | exonic | nonsynonymous SNV | ENSSSCG000000007622 |

|   |           |           |        |                   |                     |
|---|-----------|-----------|--------|-------------------|---------------------|
| 2 | 151045111 | 151045111 | exonic | nonsynonymous SNV | ENSSSCG000000036665 |
| 2 | 151115268 | 151115268 | exonic | nonsynonymous SNV | ENSSSCG000000029175 |
| 2 | 151379870 | 151379870 | exonic | nonsynonymous SNV | ENSSSCG000000038518 |
| 2 | 151489911 | 151489911 | exonic | nonsynonymous SNV | ENSSSCG000000039119 |
| 2 | 151762627 | 151762627 | exonic | nonsynonymous SNV | ENSSSCG000000060711 |
| 2 | 151762627 | 151762627 | exonic | nonsynonymous SNV | ENSSSCG000000032180 |
| 3 | 1912979   | 1912979   | exonic | nonsynonymous SNV | ENSSSCG000000007644 |
| 3 | 1913030   | 1913030   | exonic | nonsynonymous SNV | ENSSSCG000000007650 |
| 3 | 1917928   | 1917928   | exonic | nonsynonymous SNV | ENSSSCG000000007659 |
| 3 | 3634208   | 3634208   | exonic | nonsynonymous SNV | ENSSSCG000000030337 |
| 3 | 3648983   | 3648983   | exonic | nonsynonymous SNV | ENSSSCG000000028879 |
| 3 | 3907467   | 3907467   | exonic | nonsynonymous SNV | ENSSSCG000000007681 |
| 3 | 4516956   | 4516956   | exonic | nonsynonymous SNV | ENSSSCG000000007703 |
| 3 | 4517199   | 4517199   | exonic | nonsynonymous SNV | ENSSSCG000000007716 |
| 3 | 4683426   | 4683426   | exonic | nonsynonymous SNV | ENSSSCG000000007751 |
| 3 | 4744843   | 4744843   | exonic | nonsynonymous SNV | ENSSSCG000000007780 |
| 3 | 4783513   | 4783513   | exonic | nonsynonymous SNV | ENSSSCG000000007789 |
| 3 | 5009142   | 5009142   | exonic | nonsynonymous SNV | ENSSSCG000000007801 |
| 3 | 5379546   | 5379546   | exonic | nonsynonymous SNV | ENSSSCG000000027946 |
| 3 | 5395377   | 5395377   | exonic | nonsynonymous SNV | ENSSSCG000000026748 |
| 3 | 5395866   | 5395866   | exonic | nonsynonymous SNV | ENSSSCG000000010794 |
| 3 | 5396215   | 5396215   | exonic | nonsynonymous SNV | ENSSSCG000000007838 |
| 3 | 5396245   | 5396245   | exonic | nonsynonymous SNV | ENSSSCG000000030373 |
| 3 | 5396401   | 5396401   | exonic | nonsynonymous SNV | ENSSSCG000000035000 |
| 3 | 5396434   | 5396434   | exonic | nonsynonymous SNV | ENSSSCG000000007847 |
| 3 | 5488639   | 5488639   | exonic | nonsynonymous SNV | ENSSSCG000000046747 |
| 3 | 6233587   | 6233587   | exonic | nonsynonymous SNV | ENSSSCG000000007857 |
| 3 | 6237037   | 6237037   | exonic | nonsynonymous SNV | ENSSSCG000000007866 |
| 3 | 6365296   | 6365296   | exonic | nonsynonymous SNV | ENSSSCG000000040412 |
| 3 | 6431242   | 6431242   | exonic | nonsynonymous SNV | ENSSSCG000000032381 |
| 3 | 6494748   | 6494748   | exonic | nonsynonymous SNV | ENSSSCG000000024307 |
| 3 | 6794672   | 6794672   | exonic | nonsynonymous SNV | ENSSSCG000000033311 |
| 3 | 7514842   | 7514842   | exonic | nonsynonymous SNV | ENSSSCG000000007914 |
| 3 | 7679636   | 7679636   | exonic | nonsynonymous SNV | ENSSSCG000000043838 |
| 3 | 8006070   | 8006070   | exonic | nonsynonymous SNV | ENSSSCG000000021569 |
| 3 | 8100148   | 8100148   | exonic | nonsynonymous SNV | ENSSSCG000000030518 |
| 3 | 8195353   | 8195353   | exonic | nonsynonymous SNV | ENSSSCG000000008055 |
| 3 | 8195383   | 8195383   | exonic | nonsynonymous SNV | ENSSSCG000000008051 |
| 3 | 8336237   | 8336237   | exonic | nonsynonymous SNV | ENSSSCG000000052991 |
| 3 | 8347210   | 8347210   | exonic | nonsynonymous SNV | ENSSSCG000000008047 |
| 3 | 8415088   | 8415088   | exonic | nonsynonymous SNV | ENSSSCG000000008041 |
| 3 | 8915076   | 8915076   | exonic | nonsynonymous SNV | ENSSSCG000000008013 |
| 3 | 9661194   | 9661194   | exonic | nonsynonymous SNV | ENSSSCG000000021467 |
| 3 | 10647921  | 10647921  | exonic | nonsynonymous SNV | ENSSSCG000000008020 |

|   |          |          |        |                   |                    |
|---|----------|----------|--------|-------------------|--------------------|
| 3 | 11078183 | 11078183 | exonic | nonsynonymous SNV | ENSSSCG00000048138 |
| 3 | 17002533 | 17002533 | exonic | nonsynonymous SNV | ENSSSCG00000034266 |
| 3 | 17615470 | 17615470 | exonic | nonsynonymous SNV | ENSSSCG00000008010 |
| 3 | 17665071 | 17665071 | exonic | nonsynonymous SNV | ENSSSCG00000008002 |
| 3 | 17666468 | 17666468 | exonic | nonsynonymous SNV | ENSSSCG00000058140 |
| 3 | 17925221 | 17925221 | exonic | nonsynonymous SNV | ENSSSCG00000007991 |
| 3 | 18081104 | 18081104 | exonic | nonsynonymous SNV | ENSSSCG00000008068 |
| 3 | 22540505 | 22540505 | exonic | nonsynonymous SNV | ENSSSCG00000034154 |
| 3 | 22594571 | 22594571 | exonic | nonsynonymous SNV | ENSSSCG00000008122 |
| 3 | 23645193 | 23645193 | exonic | nonsynonymous SNV | ENSSSCG00000031072 |
| 3 | 23720245 | 23720245 | exonic | nonsynonymous SNV | ENSSSCG00000008135 |
| 3 | 24320931 | 24320931 | exonic | nonsynonymous SNV | ENSSSCG00000008138 |
| 3 | 24572953 | 24572953 | exonic | nonsynonymous SNV | ENSSSCG00000008155 |
| 3 | 24960117 | 24960117 | exonic | nonsynonymous SNV | ENSSSCG00000008165 |
| 3 | 25262463 | 25262463 | exonic | nonsynonymous SNV | ENSSSCG00000008169 |
| 3 | 26323416 | 26323416 | exonic | nonsynonymous SNV | ENSSSCG00000008171 |
| 3 | 28816532 | 28816532 | exonic | nonsynonymous SNV | ENSSSCG00000008194 |
| 3 | 31574798 | 31574798 | exonic | nonsynonymous SNV | ENSSSCG00000008197 |
| 3 | 31864514 | 31864514 | exonic | nonsynonymous SNV | ENSSSCG00000025106 |
| 3 | 33894170 | 33894170 | exonic | nonsynonymous SNV | ENSSSCG00000008213 |
| 3 | 34049173 | 34049173 | exonic | nonsynonymous SNV | ENSSSCG00000023710 |
| 3 | 38936146 | 38936146 | exonic | nonsynonymous SNV | ENSSSCG00000008239 |
| 3 | 39133702 | 39133702 | exonic | nonsynonymous SNV | ENSSSCG00000008241 |
| 3 | 39303452 | 39303452 | exonic | nonsynonymous SNV | ENSSSCG00000045529 |
| 3 | 39580662 | 39580662 | exonic | nonsynonymous SNV | ENSSSCG00000027320 |
| 3 | 39708146 | 39708146 | exonic | nonsynonymous SNV | ENSSSCG00000008292 |
| 3 | 39755302 | 39755302 | exonic | nonsynonymous SNV | ENSSSCG00000023258 |
| 3 | 39762852 | 39762852 | exonic | nonsynonymous SNV | ENSSSCG00000008344 |
| 3 | 39865589 | 39865589 | exonic | nonsynonymous SNV | ENSSSCG00000023908 |
| 3 | 39897597 | 39897597 | exonic | nonsynonymous SNV | ENSSSCG00000026559 |
| 3 | 39898136 | 39898136 | exonic | nonsynonymous SNV | ENSSSCG00000029084 |
| 3 | 40177350 | 40177350 | exonic | nonsynonymous SNV | ENSSSCG00000008467 |
| 3 | 40191363 | 40191363 | exonic | nonsynonymous SNV | ENSSSCG00000008512 |
| 3 | 40364314 | 40364314 | exonic | nonsynonymous SNV | ENSSSCG00000024781 |
| 3 | 40430601 | 40430601 | exonic | nonsynonymous SNV | ENSSSCG00000037201 |
| 3 | 40647786 | 40647786 | exonic | nonsynonymous SNV | ENSSSCG00000063152 |
| 3 | 41000908 | 41000908 | exonic | nonsynonymous SNV | ENSSSCG00000043825 |
| 3 | 41049605 | 41049605 | exonic | nonsynonymous SNV | ENSSSCG00000033511 |
| 3 | 41062390 | 41062390 | exonic | nonsynonymous SNV | ENSSSCG00000008589 |
| 3 | 41107758 | 41107758 | exonic | nonsynonymous SNV | ENSSSCG00000008595 |
| 3 | 41964577 | 41964577 | exonic | nonsynonymous SNV | ENSSSCG00000040752 |
| 3 | 42777605 | 42777605 | exonic | nonsynonymous SNV | ENSSSCG00000008621 |
| 3 | 42808173 | 42808173 | exonic | nonsynonymous SNV | ENSSSCG00000025483 |
| 3 | 45761804 | 45761804 | exonic | nonsynonymous SNV | ENSSSCG00000008649 |

|   |           |           |        |                   |                     |
|---|-----------|-----------|--------|-------------------|---------------------|
| 3 | 46117672  | 46117672  | exonic | nonsynonymous SNV | ENSSSCG00000006956  |
| 3 | 47516120  | 47516120  | exonic | nonsynonymous SNV | ENSSSCG000000034820 |
| 3 | 47725432  | 47725432  | exonic | nonsynonymous SNV | ENSSSCG000000039881 |
| 3 | 47751157  | 47751157  | exonic | nonsynonymous SNV | ENSSSCG000000033726 |
| 3 | 51693006  | 51693006  | exonic | nonsynonymous SNV | ENSSSCG00000005938  |
| 3 | 52889909  | 52889909  | exonic | nonsynonymous SNV | ENSSSCG00000005939  |
| 3 | 53252694  | 53252694  | exonic | nonsynonymous SNV | ENSSSCG00000005948  |
| 3 | 53300170  | 53300170  | exonic | nonsynonymous SNV | ENSSSCG00000005983  |
| 3 | 56612640  | 56612640  | exonic | nonsynonymous SNV | ENSSSCG00000005995  |
| 3 | 56757572  | 56757572  | exonic | nonsynonymous SNV | ENSSSCG00000005997  |
| 3 | 57818814  | 57818814  | exonic | nonsynonymous SNV | ENSSSCG00000006011  |
| 3 | 57971640  | 57971640  | exonic | nonsynonymous SNV | ENSSSCG00000006037  |
| 3 | 57971807  | 57971807  | exonic | nonsynonymous SNV | ENSSSCG000000044983 |
| 3 | 58536976  | 58536976  | exonic | nonsynonymous SNV | ENSSSCG000000050468 |
| 3 | 58536984  | 58536984  | exonic | nonsynonymous SNV | ENSSSCG000000024290 |
| 3 | 59357470  | 59357470  | exonic | nonsynonymous SNV | ENSSSCG000000033791 |
| 3 | 59357502  | 59357502  | exonic | nonsynonymous SNV | ENSSSCG000000048309 |
| 3 | 59458920  | 59458920  | exonic | nonsynonymous SNV | ENSSSCG000000006185 |
| 3 | 59912694  | 59912694  | exonic | nonsynonymous SNV | ENSSSCG000000006187 |
| 3 | 59996211  | 59996211  | exonic | nonsynonymous SNV | ENSSSCG000000006206 |
| 3 | 68791493  | 68791493  | exonic | nonsynonymous SNV | ENSSSCG000000034495 |
| 3 | 68925769  | 68925769  | exonic | nonsynonymous SNV | ENSSSCG000000006274 |
| 3 | 71688611  | 71688611  | exonic | nonsynonymous SNV | ENSSSCG000000006284 |
| 3 | 71688869  | 71688869  | exonic | nonsynonymous SNV | ENSSSCG000000006305 |
| 3 | 73558309  | 73558309  | exonic | nonsynonymous SNV | ENSSSCG000000006372 |
| 3 | 74724318  | 74724318  | exonic | nonsynonymous SNV | ENSSSCG000000062362 |
| 3 | 86261615  | 86261615  | exonic | nonsynonymous SNV | ENSSSCG000000006418 |
| 3 | 91774450  | 91774450  | exonic | nonsynonymous SNV | ENSSSCG000000006431 |
| 3 | 98034098  | 98034098  | exonic | nonsynonymous SNV | ENSSSCG000000053741 |
| 3 | 106829002 | 106829002 | exonic | nonsynonymous SNV | ENSSSCG000000022686 |
| 3 | 108166772 | 108166772 | exonic | nonsynonymous SNV | ENSSSCG000000030145 |
| 3 | 111821708 | 111821708 | exonic | nonsynonymous SNV | ENSSSCG000000058723 |
| 3 | 111835205 | 111835205 | exonic | nonsynonymous SNV | ENSSSCG000000006468 |
| 3 | 111855735 | 111855735 | exonic | nonsynonymous SNV | ENSSSCG000000006470 |
| 3 | 112156094 | 112156094 | exonic | nonsynonymous SNV | ENSSSCG000000006477 |
| 3 | 114642653 | 114642653 | exonic | nonsynonymous SNV | ENSSSCG000000006495 |
| 3 | 117273113 | 117273113 | exonic | nonsynonymous SNV | ENSSSCG000000006510 |
| 3 | 117276590 | 117276590 | exonic | nonsynonymous SNV | ENSSSCG000000006518 |
| 3 | 117304683 | 117304683 | exonic | nonsynonymous SNV | ENSSSCG000000006523 |
| 3 | 117306996 | 117306996 | exonic | nonsynonymous SNV | ENSSSCG000000006533 |
| 3 | 117307292 | 117307292 | exonic | nonsynonymous SNV | ENSSSCG000000028606 |
| 3 | 117311373 | 117311373 | exonic | nonsynonymous SNV | ENSSSCG000000006546 |
| 3 | 117311945 | 117311945 | exonic | nonsynonymous SNV | ENSSSCG000000006555 |
| 3 | 120021452 | 120021452 | exonic | nonsynonymous SNV | ENSSSCG000000038991 |

|   |           |           |        |                   |                     |
|---|-----------|-----------|--------|-------------------|---------------------|
| 3 | 121882891 | 121882891 | exonic | nonsynonymous SNV | ENSSSCG000000053832 |
| 3 | 125117504 | 125117504 | exonic | nonsynonymous SNV | ENSSSCG000000006604 |
| 3 | 125153500 | 125153500 | exonic | nonsynonymous SNV | ENSSSCG000000026259 |
| 3 | 129799051 | 129799051 | exonic | nonsynonymous SNV | ENSSSCG000000006619 |
| 4 | 1012822   | 1012822   | exonic | nonsynonymous SNV | ENSSSCG000000022784 |
| 4 | 1092781   | 1092781   | exonic | nonsynonymous SNV | ENSSSCG000000024481 |
| 4 | 1217758   | 1217758   | exonic | nonsynonymous SNV | ENSSSCG000000006713 |
| 4 | 1551222   | 1551222   | exonic | nonsynonymous SNV | ENSSSCG000000006720 |
| 4 | 4270802   | 4270802   | exonic | nonsynonymous SNV | ENSSSCG000000006733 |
| 4 | 4640938   | 4640938   | exonic | nonsynonymous SNV | ENSSSCG000000006746 |
| 4 | 8306129   | 8306129   | exonic | nonsynonymous SNV | ENSSSCG000000032417 |
| 4 | 8322775   | 8322775   | exonic | nonsynonymous SNV | ENSSSCG000000006755 |
| 4 | 16033374  | 16033374  | exonic | nonsynonymous SNV | ENSSSCG000000006758 |
| 4 | 18571093  | 18571093  | exonic | nonsynonymous SNV | ENSSSCG000000006801 |
| 4 | 18887111  | 18887111  | exonic | nonsynonymous SNV | ENSSSCG000000006842 |
| 4 | 21524527  | 21524527  | exonic | nonsynonymous SNV | ENSSSCG000000036509 |
| 4 | 30796035  | 30796035  | exonic | nonsynonymous SNV | ENSSSCG000000006904 |
| 4 | 31266048  | 31266048  | exonic | nonsynonymous SNV | ENSSSCG000000030801 |
| 4 | 35326376  | 35326376  | exonic | nonsynonymous SNV | ENSSSCG000000062656 |
| 4 | 42344935  | 42344935  | exonic | nonsynonymous SNV | ENSSSCG000000059930 |
| 4 | 54949027  | 54949027  | exonic | nonsynonymous SNV | ENSSSCG000000031738 |
| 4 | 57607370  | 57607370  | exonic | nonsynonymous SNV | ENSSSCG000000006939 |
| 4 | 62880473  | 62880473  | exonic | nonsynonymous SNV | ENSSSCG000000000960 |
| 4 | 63710279  | 63710279  | exonic | nonsynonymous SNV | ENSSSCG000000000964 |
| 4 | 67940314  | 67940314  | exonic | nonsynonymous SNV | ENSSSCG000000023749 |
| 4 | 78633273  | 78633273  | exonic | nonsynonymous SNV | ENSSSCG000000000981 |
| 4 | 79828333  | 79828333  | exonic | nonsynonymous SNV | ENSSSCG000000031361 |
| 4 | 81207309  | 81207309  | exonic | nonsynonymous SNV | ENSSSCG000000000002 |
| 4 | 83157093  | 83157093  | exonic | nonsynonymous SNV | ENSSSCG000000024718 |
| 4 | 89375871  | 89375871  | exonic | nonsynonymous SNV | ENSSSCG000000000014 |
| 4 | 89504404  | 89504404  | exonic | nonsynonymous SNV | ENSSSCG000000000022 |
| 4 | 91391331  | 91391331  | exonic | nonsynonymous SNV | ENSSSCG000000000033 |
| 4 | 91497439  | 91497439  | exonic | nonsynonymous SNV | ENSSSCG000000000132 |
| 4 | 91712802  | 91712802  | exonic | nonsynonymous SNV | ENSSSCG000000024881 |
| 4 | 91967738  | 91967738  | exonic | nonsynonymous SNV | ENSSSCG000000032861 |
| 4 | 91980448  | 91980448  | exonic | nonsynonymous SNV | ENSSSCG000000000195 |
| 4 | 92099909  | 92099909  | exonic | nonsynonymous SNV | ENSSSCG000000032269 |
| 4 | 93340991  | 93340991  | exonic | nonsynonymous SNV | ENSSSCG000000026061 |
| 4 | 93359070  | 93359070  | exonic | nonsynonymous SNV | ENSSSCG000000028516 |
| 4 | 93432710  | 93432710  | exonic | nonsynonymous SNV | ENSSSCG000000000232 |
| 4 | 93868019  | 93868019  | exonic | nonsynonymous SNV | ENSSSCG000000000234 |
| 4 | 94246922  | 94246922  | exonic | nonsynonymous SNV | ENSSSCG000000000235 |
| 4 | 94557720  | 94557720  | exonic | nonsynonymous SNV | ENSSSCG000000023254 |
| 4 | 94609858  | 94609858  | exonic | nonsynonymous SNV | ENSSSCG000000027548 |



|   |           |           |        |                   |                     |
|---|-----------|-----------|--------|-------------------|---------------------|
| 4 | 94746630  | 94746630  | exonic | nonsynonymous SNV | ENSSSCG00000000259  |
| 4 | 94783704  | 94783704  | exonic | nonsynonymous SNV | ENSSSCG00000000265  |
| 4 | 95277410  | 95277410  | exonic | nonsynonymous SNV | ENSSSCG00000000278  |
| 4 | 95534309  | 95534309  | exonic | nonsynonymous SNV | ENSSSCG000000054230 |
| 4 | 96013216  | 96013216  | exonic | nonsynonymous SNV | ENSSSCG000000000385 |
| 4 | 96073628  | 96073628  | exonic | nonsynonymous SNV | ENSSSCG000000037617 |
| 4 | 96937852  | 96937852  | exonic | nonsynonymous SNV | ENSSSCG000000037767 |
| 4 | 97404056  | 97404056  | exonic | nonsynonymous SNV | ENSSSCG000000029571 |
| 4 | 97620533  | 97620533  | exonic | nonsynonymous SNV | ENSSSCG000000000504 |
| 4 | 98925035  | 98925035  | exonic | nonsynonymous SNV | ENSSSCG000000000515 |
| 4 | 100685376 | 100685376 | exonic | nonsynonymous SNV | ENSSSCG000000000588 |
| 4 | 100729539 | 100729539 | exonic | nonsynonymous SNV | ENSSSCG000000057970 |
| 4 | 101315546 | 101315546 | exonic | nonsynonymous SNV | ENSSSCG000000000612 |
| 4 | 101594722 | 101594722 | exonic | nonsynonymous SNV | ENSSSCG000000000619 |
| 4 | 103651592 | 103651592 | exonic | nonsynonymous SNV | ENSSSCG000000044781 |
| 4 | 103662298 | 103662298 | exonic | nonsynonymous SNV | ENSSSCG000000000634 |
| 4 | 104998771 | 104998771 | exonic | nonsynonymous SNV | ENSSSCG000000040465 |
| 4 | 105307519 | 105307519 | exonic | nonsynonymous SNV | ENSSSCG000000000642 |
| 4 | 105949504 | 105949504 | exonic | nonsynonymous SNV | ENSSSCG000000024402 |
| 4 | 106439388 | 106439388 | exonic | nonsynonymous SNV | ENSSSCG000000000668 |
| 4 | 109347381 | 109347381 | exonic | nonsynonymous SNV | ENSSSCG000000025252 |
| 4 | 111195959 | 111195959 | exonic | nonsynonymous SNV | ENSSSCG000000033913 |
| 4 | 122188610 | 122188610 | exonic | nonsynonymous SNV | ENSSSCG000000058867 |
| 4 | 122190831 | 122190831 | exonic | nonsynonymous SNV | ENSSSCG000000000728 |
| 4 | 124810267 | 124810267 | exonic | nonsynonymous SNV | ENSSSCG000000029464 |
| 4 | 127238768 | 127238768 | exonic | nonsynonymous SNV | ENSSSCG000000033412 |
| 4 | 127293724 | 127293724 | exonic | nonsynonymous SNV | ENSSSCG000000026537 |
| 4 | 129492746 | 129492746 | exonic | nonsynonymous SNV | ENSSSCG000000059113 |
| 4 | 129965575 | 129965575 | exonic | nonsynonymous SNV | ENSSSCG000000041764 |
| 4 | 130158664 | 130158664 | exonic | nonsynonymous SNV | ENSSSCG000000000779 |
| 4 | 130298827 | 130298827 | exonic | nonsynonymous SNV | ENSSSCG000000000781 |
| 5 | 203083    | 203083    | exonic | nonsynonymous SNV | ENSSSCG000000000791 |
| 5 | 235036    | 235036    | exonic | nonsynonymous SNV | ENSSSCG000000000795 |
| 5 | 250054    | 250054    | exonic | nonsynonymous SNV | ENSSSCG000000000800 |
| 5 | 710303    | 710303    | exonic | nonsynonymous SNV | ENSSSCG000000000804 |
| 5 | 710641    | 710641    | exonic | nonsynonymous SNV | ENSSSCG000000000810 |
| 5 | 3200392   | 3200392   | exonic | nonsynonymous SNV | ENSSSCG000000000811 |
| 5 | 3234791   | 3234791   | exonic | nonsynonymous SNV | ENSSSCG000000043909 |
| 5 | 3969950   | 3969950   | exonic | nonsynonymous SNV | ENSSSCG000000025523 |
| 5 | 4084833   | 4084833   | exonic | nonsynonymous SNV | ENSSSCG000000035713 |
| 5 | 4650012   | 4650012   | exonic | nonsynonymous SNV | ENSSSCG000000048328 |
| 5 | 5723569   | 5723569   | exonic | nonsynonymous SNV | ENSSSCG000000000856 |
| 5 | 10771101  | 10771101  | exonic | nonsynonymous SNV | ENSSSCG000000000859 |
| 5 | 13941777  | 13941777  | exonic | nonsynonymous SNV | ENSSSCG000000000869 |

|   |          |          |        |                   |                     |
|---|----------|----------|--------|-------------------|---------------------|
| 5 | 14173678 | 14173678 | exonic | nonsynonymous SNV | ENSSSCG00000000874  |
| 5 | 15285726 | 15285726 | exonic | nonsynonymous SNV | ENSSSCG00000000900  |
| 5 | 16076394 | 16076394 | exonic | nonsynonymous SNV | ENSSSCG00000000918  |
| 5 | 16247802 | 16247802 | exonic | nonsynonymous SNV | ENSSSCG00000000926  |
| 5 | 16310028 | 16310028 | exonic | nonsynonymous SNV | ENSSSCG000000032321 |
| 5 | 17274064 | 17274064 | exonic | nonsynonymous SNV | ENSSSCG00000000940  |
| 5 | 17358124 | 17358124 | exonic | nonsynonymous SNV | ENSSSCG000000039541 |
| 5 | 17717949 | 17717949 | exonic | nonsynonymous SNV | ENSSSCG000000035230 |
| 5 | 17731719 | 17731719 | exonic | nonsynonymous SNV | ENSSSCG00000002653  |
| 5 | 18076501 | 18076501 | exonic | nonsynonymous SNV | ENSSSCG000000034980 |
| 5 | 18115368 | 18115368 | exonic | nonsynonymous SNV | ENSSSCG000000060235 |
| 5 | 18382065 | 18382065 | exonic | nonsynonymous SNV | ENSSSCG000000039218 |
| 5 | 18488661 | 18488661 | exonic | nonsynonymous SNV | ENSSSCG000000055534 |
| 5 | 18496467 | 18496467 | exonic | nonsynonymous SNV | ENSSSCG00000002706  |
| 5 | 18753238 | 18753238 | exonic | nonsynonymous SNV | ENSSSCG000000028878 |
| 5 | 20231579 | 20231579 | exonic | nonsynonymous SNV | ENSSSCG00000002724  |
| 5 | 21635683 | 21635683 | exonic | nonsynonymous SNV | ENSSSCG00000002754  |
| 5 | 22313044 | 22313044 | exonic | nonsynonymous SNV | ENSSSCG000000025417 |
| 5 | 23086675 | 23086675 | exonic | nonsynonymous SNV | ENSSSCG000000039751 |
| 5 | 23097309 | 23097309 | exonic | nonsynonymous SNV | ENSSSCG000000021644 |
| 5 | 34792848 | 34792848 | exonic | nonsynonymous SNV | ENSSSCG000000002862 |
| 5 | 36274520 | 36274520 | exonic | nonsynonymous SNV | ENSSSCG000000002866 |
| 5 | 53765751 | 53765751 | exonic | nonsynonymous SNV | ENSSSCG000000039166 |
| 5 | 53782941 | 53782941 | exonic | nonsynonymous SNV | ENSSSCG000000002879 |
| 5 | 53784689 | 53784689 | exonic | nonsynonymous SNV | ENSSSCG000000025126 |
| 5 | 57987013 | 57987013 | exonic | nonsynonymous SNV | ENSSSCG000000021374 |
| 5 | 58092102 | 58092102 | exonic | nonsynonymous SNV | ENSSSCG000000002888 |
| 5 | 59424375 | 59424375 | exonic | nonsynonymous SNV | ENSSSCG000000025590 |
| 5 | 61228153 | 61228153 | exonic | nonsynonymous SNV | ENSSSCG000000058790 |
| 5 | 61402744 | 61402744 | exonic | nonsynonymous SNV | ENSSSCG000000002965 |
| 5 | 61652826 | 61652826 | exonic | nonsynonymous SNV | ENSSSCG000000024281 |
| 5 | 61667790 | 61667790 | exonic | nonsynonymous SNV | ENSSSCG000000021333 |
| 5 | 62368918 | 62368918 | exonic | nonsynonymous SNV | ENSSSCG000000030048 |
| 5 | 62814184 | 62814184 | exonic | nonsynonymous SNV | ENSSSCG000000027515 |
| 5 | 63543681 | 63543681 | exonic | nonsynonymous SNV | ENSSSCG000000048377 |
| 5 | 63638709 | 63638709 | exonic | nonsynonymous SNV | ENSSSCG000000021917 |
| 5 | 63970951 | 63970951 | exonic | nonsynonymous SNV | ENSSSCG000000035487 |
| 5 | 66469783 | 66469783 | exonic | nonsynonymous SNV | ENSSSCG000000033836 |
| 5 | 67633079 | 67633079 | exonic | nonsynonymous SNV | ENSSSCG000000055235 |
| 5 | 67853223 | 67853223 | exonic | nonsynonymous SNV | ENSSSCG000000032803 |
| 5 | 67855134 | 67855134 | exonic | nonsynonymous SNV | ENSSSCG000000003040 |
| 5 | 68906246 | 68906246 | exonic | nonsynonymous SNV | ENSSSCG000000003044 |
| 5 | 69065033 | 69065033 | exonic | nonsynonymous SNV | ENSSSCG000000003048 |
| 5 | 69375114 | 69375114 | exonic | nonsynonymous SNV | ENSSSCG000000003064 |

|   |           |           |        |                   |                     |
|---|-----------|-----------|--------|-------------------|---------------------|
| 5 | 70962318  | 70962318  | exonic | nonsynonymous SNV | ENSSSCG000000030637 |
| 5 | 71180061  | 71180061  | exonic | nonsynonymous SNV | ENSSSCG00000003059  |
| 5 | 72871704  | 72871704  | exonic | nonsynonymous SNV | ENSSSCG000000059115 |
| 5 | 74577842  | 74577842  | exonic | nonsynonymous SNV | ENSSSCG000000032434 |
| 5 | 74818116  | 74818116  | exonic | nonsynonymous SNV | ENSSSCG000000049211 |
| 5 | 76307142  | 76307142  | exonic | nonsynonymous SNV | ENSSSCG000000003068 |
| 5 | 77643295  | 77643295  | exonic | nonsynonymous SNV | ENSSSCG000000003073 |
| 5 | 77794654  | 77794654  | exonic | nonsynonymous SNV | ENSSSCG000000003081 |
| 5 | 77794654  | 77794654  | exonic | nonsynonymous SNV | ENSSSCG000000003092 |
| 5 | 78352409  | 78352409  | exonic | nonsynonymous SNV | ENSSSCG000000003104 |
| 5 | 78985567  | 78985567  | exonic | nonsynonymous SNV | ENSSSCG000000003110 |
| 5 | 79026200  | 79026200  | exonic | nonsynonymous SNV | ENSSSCG000000024240 |
| 5 | 81391464  | 81391464  | exonic | nonsynonymous SNV | ENSSSCG000000022774 |
| 5 | 82042419  | 82042419  | exonic | nonsynonymous SNV | ENSSSCG000000026689 |
| 5 | 82828145  | 82828145  | exonic | nonsynonymous SNV | ENSSSCG000000030561 |
| 5 | 83563499  | 83563499  | exonic | nonsynonymous SNV | ENSSSCG000000003146 |
| 5 | 88067614  | 88067614  | exonic | nonsynonymous SNV | ENSSSCG000000003198 |
| 5 | 91876831  | 91876831  | exonic | nonsynonymous SNV | ENSSSCG000000003195 |
| 5 | 94385248  | 94385248  | exonic | nonsynonymous SNV | ENSSSCG000000037710 |
| 5 | 96190582  | 96190582  | exonic | nonsynonymous SNV | ENSSSCG000000024736 |
| 5 | 100138815 | 100138815 | exonic | nonsynonymous SNV | ENSSSCG000000037466 |
| 6 | 603189    | 603189    | exonic | nonsynonymous SNV | ENSSSCG000000003232 |
| 6 | 959857    | 959857    | exonic | nonsynonymous SNV | ENSSSCG000000022675 |
| 6 | 966055    | 966055    | exonic | nonsynonymous SNV | ENSSSCG000000038287 |
| 6 | 1730795   | 1730795   | exonic | nonsynonymous SNV | ENSSSCG000000024567 |
| 6 | 3042453   | 3042453   | exonic | nonsynonymous SNV | ENSSSCG000000003302 |
| 6 | 4415328   | 4415328   | exonic | nonsynonymous SNV | ENSSSCG000000003301 |
| 6 | 4587552   | 4587552   | exonic | nonsynonymous SNV | ENSSSCG000000051187 |
| 6 | 12020903  | 12020903  | exonic | nonsynonymous SNV | ENSSSCG000000025343 |
| 6 | 12099889  | 12099889  | exonic | nonsynonymous SNV | ENSSSCG000000037450 |
| 6 | 12404001  | 12404001  | exonic | nonsynonymous SNV | ENSSSCG000000044019 |
| 6 | 13215495  | 13215495  | exonic | nonsynonymous SNV | ENSSSCG000000042915 |
| 6 | 17296094  | 17296094  | exonic | nonsynonymous SNV | ENSSSCG000000003987 |
| 6 | 18551089  | 18551089  | exonic | nonsynonymous SNV | ENSSSCG000000003348 |
| 6 | 18982314  | 18982314  | exonic | nonsynonymous SNV | ENSSSCG000000034547 |
| 6 | 34519443  | 34519443  | exonic | nonsynonymous SNV | ENSSSCG000000024678 |
| 6 | 42942517  | 42942517  | exonic | nonsynonymous SNV | ENSSSCG000000003360 |
| 6 | 43085128  | 43085128  | exonic | nonsynonymous SNV | ENSSSCG000000003362 |
| 6 | 44151308  | 44151308  | exonic | nonsynonymous SNV | ENSSSCG000000003382 |
| 6 | 44591691  | 44591691  | exonic | nonsynonymous SNV | ENSSSCG000000003410 |
| 6 | 44657643  | 44657643  | exonic | nonsynonymous SNV | ENSSSCG000000003468 |
| 6 | 44672745  | 44672745  | exonic | nonsynonymous SNV | ENSSSCG000000003466 |
| 6 | 44973250  | 44973250  | exonic | nonsynonymous SNV | ENSSSCG000000003478 |
| 6 | 46543285  | 46543285  | exonic | nonsynonymous SNV | ENSSSCG000000039973 |

|   |          |          |        |                   |                      |
|---|----------|----------|--------|-------------------|----------------------|
| 6 | 47372942 | 47372942 | exonic | nonsynonymous SNV | ENSSSCG00000003508   |
| 6 | 47442721 | 47442721 | exonic | nonsynonymous SNV | ENSSSCG00000003513   |
| 6 | 47554015 | 47554015 | exonic | nonsynonymous SNV | ENSSSCG00000003514   |
| 6 | 47590711 | 47590711 | exonic | nonsynonymous SNV | ENSSSCG00000003521   |
| 6 | 47907080 | 47907080 | exonic | nonsynonymous SNV | ENSSSCG00000003523   |
| 6 | 48077965 | 48077965 | exonic | nonsynonymous SNV | ENSSSCG000000038706  |
| 6 | 48350569 | 48350569 | exonic | nonsynonymous SNV | ENSSSCG000000028108  |
| 6 | 48477369 | 48477369 | exonic | nonsynonymous SNV | ENSSSCG000000026025  |
| 6 | 48667091 | 48667091 | exonic | nonsynonymous SNV | ENSSSCG000000036534  |
| 6 | 48668264 | 48668264 | exonic | nonsynonymous SNV | ENSSSCG000000026526  |
| 6 | 48744599 | 48744599 | exonic | nonsynonymous SNV | ENSSSCG000000057268  |
| 6 | 48816324 | 48816324 | exonic | nonsynonymous SNV | ENSSSCG000000033539  |
| 6 | 48822143 | 48822143 | exonic | nonsynonymous SNV | ENSSSCG000000003561  |
| 6 | 48929120 | 48929120 | exonic | nonsynonymous SNV | ENSSSCG000000003586  |
| 6 | 49230766 | 49230766 | exonic | nonsynonymous SNV | ENSSSCG000000058017  |
| 6 | 49987062 | 49987062 | exonic | nonsynonymous SNV | ENSSSCG000000003603  |
| 6 | 50021899 | 50021899 | exonic | nonsynonymous SNV | ENSSSCG000000022014  |
| 6 | 50055915 | 50055915 | exonic | nonsynonymous SNV | ENSSSCG000000040173  |
| 6 | 50376209 | 50376209 | exonic | nonsynonymous SNV | ENSSSCG000000037699  |
| 6 | 50393435 | 50393435 | exonic | nonsynonymous SNV | ENSSSCG000000003644  |
| 6 | 50438078 | 50438078 | exonic | nonsynonymous SNV | ENSSSCG000000003664  |
| 6 | 50438690 | 50438690 | exonic | nonsynonymous SNV | ENSSSCG0000000034765 |
| 6 | 50451358 | 50451358 | exonic | nonsynonymous SNV | ENSSSCG0000000039627 |
| 6 | 50451456 | 50451456 | exonic | nonsynonymous SNV | ENSSSCG000000003687  |
| 6 | 50456166 | 50456166 | exonic | nonsynonymous SNV | ENSSSCG000000003707  |
| 6 | 50503338 | 50503338 | exonic | nonsynonymous SNV | ENSSSCG0000000035965 |
| 6 | 50548061 | 50548061 | exonic | nonsynonymous SNV | ENSSSCG000000003732  |
| 6 | 50549246 | 50549246 | exonic | nonsynonymous SNV | ENSSSCG0000000030018 |
| 6 | 50565752 | 50565752 | exonic | nonsynonymous SNV | ENSSSCG0000000038632 |
| 6 | 50608125 | 50608125 | exonic | nonsynonymous SNV | ENSSSCG000000027421  |
| 6 | 50612307 | 50612307 | exonic | nonsynonymous SNV | ENSSSCG000000027660  |
| 6 | 51224229 | 51224229 | exonic | nonsynonymous SNV | ENSSSCG000000003766  |
| 6 | 52187302 | 52187302 | exonic | nonsynonymous SNV | ENSSSCG000000003768  |
| 6 | 52604949 | 52604949 | exonic | nonsynonymous SNV | ENSSSCG000000040109  |
| 6 | 52918539 | 52918539 | exonic | nonsynonymous SNV | ENSSSCG000000003788  |
| 6 | 53076321 | 53076321 | exonic | nonsynonymous SNV | ENSSSCG000000004829  |
| 6 | 53449815 | 53449815 | exonic | nonsynonymous SNV | ENSSSCG000000003815  |
| 6 | 53742004 | 53742004 | exonic | nonsynonymous SNV | ENSSSCG000000003821  |
| 6 | 53893178 | 53893178 | exonic | nonsynonymous SNV | ENSSSCG000000003825  |
| 6 | 54013627 | 54013627 | exonic | nonsynonymous SNV | ENSSSCG000000003831  |
| 6 | 54826143 | 54826143 | exonic | nonsynonymous SNV | ENSSSCG000000003848  |
| 6 | 54875195 | 54875195 | exonic | nonsynonymous SNV | ENSSSCG000000027119  |
| 6 | 55021089 | 55021089 | exonic | nonsynonymous SNV | ENSSSCG000000003861  |
| 6 | 55541524 | 55541524 | exonic | nonsynonymous SNV | ENSSSCG000000003868  |

|   |          |          |        |                   |                      |
|---|----------|----------|--------|-------------------|----------------------|
| 6 | 55787330 | 55787330 | exonic | nonsynonymous SNV | ENSSSCG000000046753  |
| 6 | 58488941 | 58488941 | exonic | nonsynonymous SNV | ENSSSCG000000003875  |
| 6 | 59099105 | 59099105 | exonic | nonsynonymous SNV | ENSSSCG000000003894  |
| 6 | 59280239 | 59280239 | exonic | nonsynonymous SNV | ENSSSCG000000063244  |
| 6 | 59280240 | 59280240 | exonic | nonsynonymous SNV | ENSSSCG000000038280  |
| 6 | 59393625 | 59393625 | exonic | nonsynonymous SNV | ENSSSCG000000026793  |
| 6 | 59402363 | 59402363 | exonic | nonsynonymous SNV | ENSSSCG000000039267  |
| 6 | 59414862 | 59414862 | exonic | nonsynonymous SNV | ENSSSCG000000003941  |
| 6 | 59425540 | 59425540 | exonic | nonsynonymous SNV | ENSSSCG000000023920  |
| 6 | 59436041 | 59436041 | exonic | nonsynonymous SNV | ENSSSCG000000027374  |
| 6 | 59535840 | 59535840 | exonic | nonsynonymous SNV | ENSSSCG000000003964  |
| 6 | 59636488 | 59636488 | exonic | nonsynonymous SNV | ENSSSCG000000023266  |
| 6 | 59642984 | 59642984 | exonic | nonsynonymous SNV | ENSSSCG000000037856  |
| 6 | 60389619 | 60389619 | exonic | nonsynonymous SNV | ENSSSCG000000001008  |
| 6 | 60505286 | 60505286 | exonic | nonsynonymous SNV | ENSSSCG000000036257  |
| 6 | 62329690 | 62329690 | exonic | nonsynonymous SNV | ENSSSCG000000046603  |
| 6 | 63754923 | 63754923 | exonic | nonsynonymous SNV | ENSSSCG000000026034  |
| 6 | 64480720 | 64480720 | exonic | nonsynonymous SNV | ENSSSCG000000001087  |
| 6 | 65062481 | 65062481 | exonic | nonsynonymous SNV | ENSSSCG000000001089  |
| 6 | 65155839 | 65155839 | exonic | nonsynonymous SNV | ENSSSCG000000052503  |
| 6 | 65284501 | 65284501 | exonic | nonsynonymous SNV | ENSSSCG000000001204  |
| 6 | 67404267 | 67404267 | exonic | nonsynonymous SNV | ENSSSCG000000001207  |
| 6 | 71225720 | 71225720 | exonic | nonsynonymous SNV | ENSSSCG000000022261  |
| 6 | 74902554 | 74902554 | exonic | nonsynonymous SNV | ENSSSCG000000001232  |
| 6 | 74919715 | 74919715 | exonic | nonsynonymous SNV | ENSSSCG0000000024161 |
| 6 | 75579859 | 75579859 | exonic | nonsynonymous SNV | ENSSSCG000000001342  |
| 6 | 77350920 | 77350920 | exonic | nonsynonymous SNV | ENSSSCG000000031492  |
| 6 | 78903040 | 78903040 | exonic | nonsynonymous SNV | ENSSSCG000000001362  |
| 6 | 78918159 | 78918159 | exonic | nonsynonymous SNV | ENSSSCG000000001396  |
| 6 | 79450490 | 79450490 | exonic | nonsynonymous SNV | ENSSSCG000000001409  |
| 6 | 79850827 | 79850827 | exonic | nonsynonymous SNV | ENSSSCG000000034664  |
| 6 | 79866918 | 79866918 | exonic | nonsynonymous SNV | ENSSSCG000000030368  |
| 6 | 79868997 | 79868997 | exonic | nonsynonymous SNV | ENSSSCG000000061569  |
| 6 | 79871122 | 79871122 | exonic | nonsynonymous SNV | ENSSSCG000000001455  |
| 6 | 79874642 | 79874642 | exonic | nonsynonymous SNV | ENSSSCG000000001459  |
| 6 | 80112670 | 80112670 | exonic | nonsynonymous SNV | ENSSSCG000000001484  |
| 6 | 80545607 | 80545607 | exonic | nonsynonymous SNV | ENSSSCG000000001504  |
| 6 | 80596764 | 80596764 | exonic | nonsynonymous SNV | ENSSSCG000000001506  |
| 6 | 81319455 | 81319455 | exonic | nonsynonymous SNV | ENSSSCG000000001518  |
| 6 | 81613526 | 81613526 | exonic | nonsynonymous SNV | ENSSSCG000000001534  |
| 6 | 81849926 | 81849926 | exonic | nonsynonymous SNV | ENSSSCG000000001549  |
| 6 | 83609522 | 83609522 | exonic | nonsynonymous SNV | ENSSSCG000000056995  |
| 6 | 83725330 | 83725330 | exonic | nonsynonymous SNV | ENSSSCG000000001592  |
| 6 | 83740164 | 83740164 | exonic | nonsynonymous SNV | ENSSSCG000000001594  |

|   |           |           |        |                   |                     |
|---|-----------|-----------|--------|-------------------|---------------------|
| 6 | 83757411  | 83757411  | exonic | nonsynonymous SNV | ENSSSCG000000036801 |
| 6 | 84177737  | 84177737  | exonic | nonsynonymous SNV | ENSSSCG000000001651 |
| 6 | 85945329  | 85945329  | exonic | nonsynonymous SNV | ENSSSCG000000001664 |
| 6 | 86030473  | 86030473  | exonic | nonsynonymous SNV | ENSSSCG000000001720 |
| 6 | 88220096  | 88220096  | exonic | nonsynonymous SNV | ENSSSCG000000001724 |
| 6 | 88689478  | 88689478  | exonic | nonsynonymous SNV | ENSSSCG000000025535 |
| 6 | 91142142  | 91142142  | exonic | nonsynonymous SNV | ENSSSCG000000002620 |
| 6 | 91833916  | 91833916  | exonic | nonsynonymous SNV | ENSSSCG000000032430 |
| 6 | 93982708  | 93982708  | exonic | nonsynonymous SNV | ENSSSCG000000038491 |
| 6 | 95554349  | 95554349  | exonic | nonsynonymous SNV | ENSSSCG000000041322 |
| 6 | 97905117  | 97905117  | exonic | nonsynonymous SNV | ENSSSCG000000036356 |
| 6 | 101215311 | 101215311 | exonic | nonsynonymous SNV | ENSSSCG000000001817 |
| 6 | 101577152 | 101577152 | exonic | nonsynonymous SNV | ENSSSCG000000001822 |
| 6 | 101667967 | 101667967 | exonic | nonsynonymous SNV | ENSSSCG000000001823 |
| 6 | 108411220 | 108411220 | exonic | nonsynonymous SNV | ENSSSCG000000030626 |
| 6 | 111418637 | 111418637 | exonic | nonsynonymous SNV | ENSSSCG000000034559 |
| 6 | 116035585 | 116035585 | exonic | nonsynonymous SNV | ENSSSCG000000032460 |
| 6 | 119190098 | 119190098 | exonic | nonsynonymous SNV | ENSSSCG000000001873 |
| 6 | 128109811 | 128109811 | exonic | nonsynonymous SNV | ENSSSCG000000001920 |
| 6 | 133596973 | 133596973 | exonic | nonsynonymous SNV | ENSSSCG000000001930 |
| 6 | 134670533 | 134670533 | exonic | nonsynonymous SNV | ENSSSCG000000001988 |
| 6 | 135245220 | 135245220 | exonic | nonsynonymous SNV | ENSSSCG000000002037 |
| 6 | 135344058 | 135344058 | exonic | nonsynonymous SNV | ENSSSCG000000022057 |
| 6 | 138828959 | 138828959 | exonic | nonsynonymous SNV | ENSSSCG000000023790 |
| 6 | 141959934 | 141959934 | exonic | nonsynonymous SNV | ENSSSCG000000059608 |
| 6 | 147838538 | 147838538 | exonic | nonsynonymous SNV | ENSSSCG000000060054 |
| 6 | 149065786 | 149065786 | exonic | nonsynonymous SNV | ENSSSCG000000052168 |
| 6 | 150157665 | 150157665 | exonic | nonsynonymous SNV | ENSSSCG000000036662 |
| 6 | 150158065 | 150158065 | exonic | nonsynonymous SNV | ENSSSCG000000002298 |
| 6 | 152432391 | 152432391 | exonic | nonsynonymous SNV | ENSSSCG000000002332 |
| 6 | 153949277 | 153949277 | exonic | nonsynonymous SNV | ENSSSCG000000056471 |
| 6 | 158970351 | 158970351 | exonic | nonsynonymous SNV | ENSSSCG000000002368 |
| 6 | 158978413 | 158978413 | exonic | nonsynonymous SNV | ENSSSCG000000002386 |
| 6 | 159515757 | 159515757 | exonic | nonsynonymous SNV | ENSSSCG000000002391 |
| 6 | 159838620 | 159838620 | exonic | nonsynonymous SNV | ENSSSCG000000024377 |
| 6 | 160156050 | 160156050 | exonic | nonsynonymous SNV | ENSSSCG000000002446 |
| 6 | 160156050 | 160156050 | exonic | nonsynonymous SNV | ENSSSCG000000002457 |
| 6 | 160156066 | 160156066 | exonic | nonsynonymous SNV | ENSSSCG000000038515 |
| 6 | 160156066 | 160156066 | exonic | nonsynonymous SNV | ENSSSCG000000002478 |
| 6 | 160853449 | 160853449 | exonic | nonsynonymous SNV | ENSSSCG000000030371 |
| 6 | 164719228 | 164719228 | exonic | nonsynonymous SNV | ENSSSCG000000042191 |
| 6 | 164737478 | 164737478 | exonic | nonsynonymous SNV | ENSSSCG000000027667 |
| 6 | 164952290 | 164952290 | exonic | nonsynonymous SNV | ENSSSCG000000002512 |
| 6 | 165103218 | 165103218 | exonic | nonsynonymous SNV | ENSSSCG000000027502 |

|   |           |           |        |                   |                    |
|---|-----------|-----------|--------|-------------------|--------------------|
| 6 | 167313723 | 167313723 | exonic | nonsynonymous SNV | ENSSSCG00000032808 |
| 6 | 167319814 | 167319814 | exonic | nonsynonymous SNV | ENSSSCG00000037035 |
| 6 | 167830508 | 167830508 | exonic | nonsynonymous SNV | ENSSSCG00000008698 |
| 6 | 167833835 | 167833835 | exonic | nonsynonymous SNV | ENSSSCG00000008722 |
| 6 | 168668375 | 168668375 | exonic | nonsynonymous SNV | ENSSSCG00000034286 |
| 6 | 168668375 | 168668375 | exonic | nonsynonymous SNV | ENSSSCG00000008709 |
| 6 | 168750364 | 168750364 | exonic | nonsynonymous SNV | ENSSSCG00000024399 |
| 6 | 169047928 | 169047928 | exonic | nonsynonymous SNV | ENSSSCG00000008735 |
| 6 | 169752485 | 169752485 | exonic | nonsynonymous SNV | ENSSSCG00000038410 |
| 7 | 1909580   | 1909580   | exonic | nonsynonymous SNV | ENSSSCG00000008738 |
| 7 | 5386031   | 5386031   | exonic | nonsynonymous SNV | ENSSSCG00000048996 |
| 7 | 10592677  | 10592677  | exonic | nonsynonymous SNV | ENSSSCG00000028632 |
| 7 | 13445168  | 13445168  | exonic | nonsynonymous SNV | ENSSSCG00000008768 |
| 7 | 19244903  | 19244903  | exonic | nonsynonymous SNV | ENSSSCG00000028471 |
| 7 | 19328916  | 19328916  | exonic | nonsynonymous SNV | ENSSSCG00000008769 |
| 7 | 21885631  | 21885631  | exonic | nonsynonymous SNV | ENSSSCG00000028983 |
| 7 | 22101124  | 22101124  | exonic | nonsynonymous SNV | ENSSSCG00000029385 |
| 7 | 22155416  | 22155416  | exonic | nonsynonymous SNV | ENSSSCG00000045169 |
| 7 | 22668717  | 22668717  | exonic | nonsynonymous SNV | ENSSSCG00000008799 |
| 7 | 22799046  | 22799046  | exonic | nonsynonymous SNV | ENSSSCG00000008812 |
| 7 | 22975496  | 22975496  | exonic | nonsynonymous SNV | ENSSSCG00000008816 |
| 7 | 23058016  | 23058016  | exonic | nonsynonymous SNV | ENSSSCG00000037950 |
| 7 | 23219093  | 23219093  | exonic | nonsynonymous SNV | ENSSSCG00000008820 |
| 7 | 23236795  | 23236795  | exonic | nonsynonymous SNV | ENSSSCG00000053955 |
| 7 | 23622846  | 23622846  | exonic | nonsynonymous SNV | ENSSSCG00000036417 |
| 7 | 23752057  | 23752057  | exonic | nonsynonymous SNV | ENSSSCG00000051162 |
| 7 | 23752565  | 23752565  | exonic | nonsynonymous SNV | ENSSSCG00000008870 |
| 7 | 23835601  | 23835601  | exonic | nonsynonymous SNV | ENSSSCG00000008873 |
| 7 | 23912062  | 23912062  | exonic | nonsynonymous SNV | ENSSSCG00000039175 |
| 7 | 24882411  | 24882411  | exonic | nonsynonymous SNV | ENSSSCG00000038890 |
| 7 | 24901590  | 24901590  | exonic | nonsynonymous SNV | ENSSSCG00000022283 |
| 7 | 25032843  | 25032843  | exonic | nonsynonymous SNV | ENSSSCG00000047476 |
| 7 | 26485949  | 26485949  | exonic | nonsynonymous SNV | ENSSSCG00000053199 |
| 7 | 29646260  | 29646260  | exonic | nonsynonymous SNV | ENSSSCG00000025514 |
| 7 | 29656246  | 29656246  | exonic | nonsynonymous SNV | ENSSSCG00000027609 |
| 7 | 29889211  | 29889211  | exonic | nonsynonymous SNV | ENSSSCG00000008948 |
| 7 | 30898887  | 30898887  | exonic | nonsynonymous SNV | ENSSSCG00000008973 |
| 7 | 31543474  | 31543474  | exonic | nonsynonymous SNV | ENSSSCG00000008993 |
| 7 | 34555423  | 34555423  | exonic | nonsynonymous SNV | ENSSSCG00000026886 |
| 7 | 34717614  | 34717614  | exonic | nonsynonymous SNV | ENSSSCG00000009001 |
| 7 | 34762031  | 34762031  | exonic | nonsynonymous SNV | ENSSSCG00000009011 |
| 7 | 37225946  | 37225946  | exonic | nonsynonymous SNV | ENSSSCG00000020879 |
| 7 | 38022046  | 38022046  | exonic | nonsynonymous SNV | ENSSSCG00000058219 |
| 7 | 38314468  | 38314468  | exonic | nonsynonymous SNV | ENSSSCG00000026360 |

|   |           |           |        |                   |                    |
|---|-----------|-----------|--------|-------------------|--------------------|
| 7 | 41436326  | 41436326  | exonic | nonsynonymous SNV | ENSSSCG00000030396 |
| 7 | 41619630  | 41619630  | exonic | nonsynonymous SNV | ENSSSCG00000029943 |
| 7 | 44750460  | 44750460  | exonic | nonsynonymous SNV | ENSSSCG00000022173 |
| 7 | 46318596  | 46318596  | exonic | nonsynonymous SNV | ENSSSCG00000009090 |
| 7 | 48416894  | 48416894  | exonic | nonsynonymous SNV | ENSSSCG00000009096 |
| 7 | 50750550  | 50750550  | exonic | nonsynonymous SNV | ENSSSCG00000029260 |
| 7 | 52676025  | 52676025  | exonic | nonsynonymous SNV | ENSSSCG00000009114 |
| 7 | 52955193  | 52955193  | exonic | nonsynonymous SNV | ENSSSCG00000009136 |
| 7 | 53464633  | 53464633  | exonic | nonsynonymous SNV | ENSSSCG00000009140 |
| 7 | 53471128  | 53471128  | exonic | nonsynonymous SNV | ENSSSCG00000039813 |
| 7 | 53549042  | 53549042  | exonic | nonsynonymous SNV | ENSSSCG00000022788 |
| 7 | 53592784  | 53592784  | exonic | nonsynonymous SNV | ENSSSCG00000023296 |
| 7 | 53750767  | 53750767  | exonic | nonsynonymous SNV | ENSSSCG00000009176 |
| 7 | 54125117  | 54125117  | exonic | nonsynonymous SNV | ENSSSCG00000062441 |
| 7 | 54200859  | 54200859  | exonic | nonsynonymous SNV | ENSSSCG00000051020 |
| 7 | 57972261  | 57972261  | exonic | nonsynonymous SNV | ENSSSCG00000009184 |
| 7 | 60010834  | 60010834  | exonic | nonsynonymous SNV | ENSSSCG00000022353 |
| 7 | 61026083  | 61026083  | exonic | nonsynonymous SNV | ENSSSCG00000022986 |
| 7 | 74971451  | 74971451  | exonic | nonsynonymous SNV | ENSSSCG00000038867 |
| 7 | 75999954  | 75999954  | exonic | nonsynonymous SNV | ENSSSCG00000026655 |
| 7 | 76857608  | 76857608  | exonic | nonsynonymous SNV | ENSSSCG00000009230 |
| 7 | 77038682  | 77038682  | exonic | nonsynonymous SNV | ENSSSCG00000014581 |
| 7 | 78250104  | 78250104  | exonic | nonsynonymous SNV | ENSSSCG00000014587 |
| 7 | 79587214  | 79587214  | exonic | nonsynonymous SNV | ENSSSCG00000059225 |
| 7 | 79996720  | 79996720  | exonic | nonsynonymous SNV | ENSSSCG00000056036 |
| 7 | 80427403  | 80427403  | exonic | nonsynonymous SNV | ENSSSCG00000036687 |
| 7 | 91541283  | 91541283  | exonic | nonsynonymous SNV | ENSSSCG00000057177 |
| 7 | 95024161  | 95024161  | exonic | nonsynonymous SNV | ENSSSCG00000060093 |
| 7 | 96900825  | 96900825  | exonic | nonsynonymous SNV | ENSSSCG00000061789 |
| 7 | 97784613  | 97784613  | exonic | nonsynonymous SNV | ENSSSCG00000063516 |
| 7 | 99223597  | 99223597  | exonic | nonsynonymous SNV | ENSSSCG00000049272 |
| 7 | 99993320  | 99993320  | exonic | nonsynonymous SNV | ENSSSCG00000044470 |
| 7 | 112753039 | 112753039 | exonic | nonsynonymous SNV | ENSSSCG00000021619 |
| 7 | 113636715 | 113636715 | exonic | nonsynonymous SNV | ENSSSCG00000014598 |
| 7 | 113642456 | 113642456 | exonic | nonsynonymous SNV | ENSSSCG00000029189 |
| 7 | 114367935 | 114367935 | exonic | nonsynonymous SNV | ENSSSCG00000055267 |
| 7 | 115609284 | 115609284 | exonic | nonsynonymous SNV | ENSSSCG00000021919 |
| 7 | 115729379 | 115729379 | exonic | nonsynonymous SNV | ENSSSCG00000031506 |
| 7 | 115851949 | 115851949 | exonic | nonsynonymous SNV | ENSSSCG00000055108 |
| 7 | 120260741 | 120260741 | exonic | nonsynonymous SNV | ENSSSCG00000060652 |
| 7 | 120834511 | 120834511 | exonic | nonsynonymous SNV | ENSSSCG00000014728 |
| 7 | 121061152 | 121061152 | exonic | nonsynonymous SNV | ENSSSCG00000014759 |
| 8 | 120271    | 120271    | exonic | nonsynonymous SNV | ENSSSCG00000039656 |
| 8 | 416300    | 416300    | exonic | nonsynonymous SNV | ENSSSCG00000014835 |



|   |          |          |        |                   |                    |
|---|----------|----------|--------|-------------------|--------------------|
| 8 | 590153   | 590153   | exonic | nonsynonymous SNV | ENSSSCG00000014897 |
| 8 | 1989650  | 1989650  | exonic | nonsynonymous SNV | ENSSSCG00000014909 |
| 8 | 2868743  | 2868743  | exonic | nonsynonymous SNV | ENSSSCG00000014920 |
| 8 | 4437621  | 4437621  | exonic | nonsynonymous SNV | ENSSSCG00000046061 |
| 8 | 4643825  | 4643825  | exonic | nonsynonymous SNV | ENSSSCG00000014934 |
| 8 | 4644747  | 4644747  | exonic | nonsynonymous SNV | ENSSSCG00000014952 |
| 8 | 4678451  | 4678451  | exonic | nonsynonymous SNV | ENSSSCG00000014977 |
| 8 | 4982277  | 4982277  | exonic | nonsynonymous SNV | ENSSSCG00000015001 |
| 8 | 5003201  | 5003201  | exonic | nonsynonymous SNV | ENSSSCG00000015009 |
| 8 | 9228033  | 9228033  | exonic | nonsynonymous SNV | ENSSSCG00000015010 |
| 8 | 10401565 | 10401565 | exonic | nonsynonymous SNV | ENSSSCG00000015018 |
| 8 | 10874177 | 10874177 | exonic | nonsynonymous SNV | ENSSSCG00000015039 |
| 8 | 10896504 | 10896504 | exonic | nonsynonymous SNV | ENSSSCG00000015080 |
| 8 | 18052929 | 18052929 | exonic | nonsynonymous SNV | ENSSSCG00000015082 |
| 8 | 19450420 | 19450420 | exonic | nonsynonymous SNV | ENSSSCG00000023324 |
| 8 | 19450779 | 19450779 | exonic | nonsynonymous SNV | ENSSSCG00000015099 |
| 8 | 27798215 | 27798215 | exonic | nonsynonymous SNV | ENSSSCG00000020685 |
| 8 | 28024893 | 28024893 | exonic | nonsynonymous SNV | ENSSSCG00000015202 |
| 8 | 28034289 | 28034289 | exonic | nonsynonymous SNV | ENSSSCG00000015203 |
| 8 | 28306579 | 28306579 | exonic | nonsynonymous SNV | ENSSSCG00000015227 |
| 8 | 29483571 | 29483571 | exonic | nonsynonymous SNV | ENSSSCG00000015237 |
| 8 | 29548972 | 29548972 | exonic | nonsynonymous SNV | ENSSSCG00000015246 |
| 8 | 30708680 | 30708680 | exonic | nonsynonymous SNV | ENSSSCG00000015250 |
| 8 | 31594939 | 31594939 | exonic | nonsynonymous SNV | ENSSSCG00000032446 |
| 8 | 32707567 | 32707567 | exonic | nonsynonymous SNV | ENSSSCG00000015294 |
| 8 | 32716380 | 32716380 | exonic | nonsynonymous SNV | ENSSSCG00000021276 |
| 8 | 37506211 | 37506211 | exonic | nonsynonymous SNV | ENSSSCG00000015310 |
| 8 | 37875024 | 37875024 | exonic | nonsynonymous SNV | ENSSSCG00000022982 |
| 8 | 37955577 | 37955577 | exonic | nonsynonymous SNV | ENSSSCG00000015328 |
| 8 | 38053512 | 38053512 | exonic | nonsynonymous SNV | ENSSSCG00000047863 |
| 8 | 42150769 | 42150769 | exonic | nonsynonymous SNV | ENSSSCG00000038187 |
| 8 | 42514532 | 42514532 | exonic | nonsynonymous SNV | ENSSSCG00000015342 |
| 8 | 44146944 | 44146944 | exonic | nonsynonymous SNV | ENSSSCG00000015346 |
| 8 | 44587713 | 44587713 | exonic | nonsynonymous SNV | ENSSSCG00000022543 |
| 8 | 47096586 | 47096586 | exonic | nonsynonymous SNV | ENSSSCG00000049585 |
| 8 | 52471535 | 52471535 | exonic | nonsynonymous SNV | ENSSSCG00000015353 |
| 8 | 53603355 | 53603355 | exonic | nonsynonymous SNV | ENSSSCG00000015379 |
| 8 | 55255694 | 55255694 | exonic | nonsynonymous SNV | ENSSSCG00000015386 |
| 8 | 66235680 | 66235680 | exonic | nonsynonymous SNV | ENSSSCG00000032241 |
| 8 | 66474601 | 66474601 | exonic | nonsynonymous SNV | ENSSSCG00000024520 |
| 8 | 67551553 | 67551553 | exonic | nonsynonymous SNV | ENSSSCG00000015430 |
| 8 | 68335846 | 68335846 | exonic | nonsynonymous SNV | ENSSSCG00000054021 |
| 8 | 69582988 | 69582988 | exonic | nonsynonymous SNV | ENSSSCG00000015432 |
| 8 | 71574630 | 71574630 | exonic | nonsynonymous SNV | ENSSSCG00000015445 |

|   |           |           |        |                   |                    |
|---|-----------|-----------|--------|-------------------|--------------------|
| 8 | 74041390  | 74041390  | exonic | nonsynonymous SNV | ENSSSCG00000015450 |
| 8 | 74933544  | 74933544  | exonic | nonsynonymous SNV | ENSSSCG00000015477 |
| 8 | 75433065  | 75433065  | exonic | nonsynonymous SNV | ENSSSCG00000015509 |
| 8 | 75433619  | 75433619  | exonic | nonsynonymous SNV | ENSSSCG00000015535 |
| 8 | 76108922  | 76108922  | exonic | nonsynonymous SNV | ENSSSCG00000015548 |
| 8 | 76116693  | 76116693  | exonic | nonsynonymous SNV | ENSSSCG00000015555 |
| 8 | 76670439  | 76670439  | exonic | nonsynonymous SNV | ENSSSCG00000035595 |
| 8 | 78168208  | 78168208  | exonic | nonsynonymous SNV | ENSSSCG00000015602 |
| 8 | 86666759  | 86666759  | exonic | nonsynonymous SNV | ENSSSCG00000038066 |
| 8 | 87478888  | 87478888  | exonic | nonsynonymous SNV | ENSSSCG00000010829 |
| 8 | 87512708  | 87512708  | exonic | nonsynonymous SNV | ENSSSCG00000034164 |
| 8 | 95977815  | 95977815  | exonic | nonsynonymous SNV | ENSSSCG00000031212 |
| 8 | 99821926  | 99821926  | exonic | nonsynonymous SNV | ENSSSCG00000010879 |
| 8 | 101767586 | 101767586 | exonic | nonsynonymous SNV | ENSSSCG00000010885 |
| 8 | 102272042 | 102272042 | exonic | nonsynonymous SNV | ENSSSCG00000021897 |
| 8 | 103086106 | 103086106 | exonic | nonsynonymous SNV | ENSSSCG00000024784 |
| 8 | 105122093 | 105122093 | exonic | nonsynonymous SNV | ENSSSCG00000039843 |
| 8 | 112384602 | 112384602 | exonic | nonsynonymous SNV | ENSSSCG00000034151 |
| 8 | 112533138 | 112533138 | exonic | nonsynonymous SNV | ENSSSCG00000010926 |
| 8 | 113101595 | 113101595 | exonic | nonsynonymous SNV | ENSSSCG00000040707 |
| 8 | 116277375 | 116277375 | exonic | nonsynonymous SNV | ENSSSCG00000039342 |
| 8 | 117925371 | 117925371 | exonic | nonsynonymous SNV | ENSSSCG00000033196 |
| 8 | 117925410 | 117925410 | exonic | nonsynonymous SNV | ENSSSCG00000024384 |
| 8 | 117931134 | 117931134 | exonic | nonsynonymous SNV | ENSSSCG00000010990 |
| 8 | 120638982 | 120638982 | exonic | nonsynonymous SNV | ENSSSCG00000035454 |
| 8 | 121027789 | 121027789 | exonic | nonsynonymous SNV | ENSSSCG00000030408 |
| 8 | 121027960 | 121027960 | exonic | nonsynonymous SNV | ENSSSCG00000011070 |
| 8 | 121198716 | 121198716 | exonic | nonsynonymous SNV | ENSSSCG00000055608 |
| 8 | 121229998 | 121229998 | exonic | nonsynonymous SNV | ENSSSCG00000022045 |
| 8 | 121975385 | 121975385 | exonic | nonsynonymous SNV | ENSSSCG00000038007 |
| 8 | 128525336 | 128525336 | exonic | nonsynonymous SNV | ENSSSCG00000047783 |
| 8 | 130759230 | 130759230 | exonic | nonsynonymous SNV | ENSSSCG00000011046 |
| 8 | 132077484 | 132077484 | exonic | nonsynonymous SNV | ENSSSCG00000039658 |
| 8 | 132081385 | 132081385 | exonic | nonsynonymous SNV | ENSSSCG00000039244 |
| 8 | 133891633 | 133891633 | exonic | nonsynonymous SNV | ENSSSCG00000011068 |
| 9 | 1192852   | 1192852   | exonic | nonsynonymous SNV | ENSSSCG00000011060 |
| 9 | 1410737   | 1410737   | exonic | nonsynonymous SNV | ENSSSCG00000038536 |
| 9 | 1455408   | 1455408   | exonic | nonsynonymous SNV | ENSSSCG00000011074 |
| 9 | 1474728   | 1474728   | exonic | nonsynonymous SNV | ENSSSCG00000011078 |
| 9 | 1540201   | 1540201   | exonic | nonsynonymous SNV | ENSSSCG00000011080 |
| 9 | 1540503   | 1540503   | exonic | nonsynonymous SNV | ENSSSCG00000040615 |
| 9 | 1662294   | 1662294   | exonic | nonsynonymous SNV | ENSSSCG00000011102 |
| 9 | 1678076   | 1678076   | exonic | nonsynonymous SNV | ENSSSCG00000011103 |
| 9 | 1847190   | 1847190   | exonic | nonsynonymous SNV | ENSSSCG00000011114 |

|   |          |          |        |                   |                     |
|---|----------|----------|--------|-------------------|---------------------|
| 9 | 1869207  | 1869207  | exonic | nonsynonymous SNV | ENSSSCG00000039539  |
| 9 | 1900313  | 1900313  | exonic | nonsynonymous SNV | ENSSSCG00000023105  |
| 9 | 1917107  | 1917107  | exonic | nonsynonymous SNV | ENSSSCG00000011162  |
| 9 | 1948335  | 1948335  | exonic | nonsynonymous SNV | ENSSSCG00000035493  |
| 9 | 2023335  | 2023335  | exonic | nonsynonymous SNV | ENSSSCG00000023771  |
| 9 | 3113965  | 3113965  | exonic | nonsynonymous SNV | ENSSSCG00000009308  |
| 9 | 3114397  | 3114397  | exonic | nonsynonymous SNV | ENSSSCG00000009313  |
| 9 | 3489589  | 3489589  | exonic | nonsynonymous SNV | ENSSSCG00000025996  |
| 9 | 4131723  | 4131723  | exonic | nonsynonymous SNV | ENSSSCG00000028065  |
| 9 | 4192951  | 4192951  | exonic | nonsynonymous SNV | ENSSSCG00000009338  |
| 9 | 4706132  | 4706132  | exonic | nonsynonymous SNV | ENSSSCG00000046579  |
| 9 | 4737371  | 4737371  | exonic | nonsynonymous SNV | ENSSSCG000000051344 |
| 9 | 4845593  | 4845593  | exonic | nonsynonymous SNV | ENSSSCG00000009357  |
| 9 | 5330541  | 5330541  | exonic | nonsynonymous SNV | ENSSSCG00000056668  |
| 9 | 6283243  | 6283243  | exonic | nonsynonymous SNV | ENSSSCG00000009364  |
| 9 | 8464824  | 8464824  | exonic | nonsynonymous SNV | ENSSSCG00000009411  |
| 9 | 16922608 | 16922608 | exonic | nonsynonymous SNV | ENSSSCG00000009413  |
| 9 | 16922968 | 16922968 | exonic | nonsynonymous SNV | ENSSSCG000000031627 |
| 9 | 19647101 | 19647101 | exonic | nonsynonymous SNV | ENSSSCG000000025120 |
| 9 | 20718786 | 20718786 | exonic | nonsynonymous SNV | ENSSSCG000000049910 |
| 9 | 22998767 | 22998767 | exonic | nonsynonymous SNV | ENSSSCG000000050522 |
| 9 | 23194069 | 23194069 | exonic | nonsynonymous SNV | ENSSSCG000000035248 |
| 9 | 26520311 | 26520311 | exonic | nonsynonymous SNV | ENSSSCG00000009486  |
| 9 | 26520610 | 26520610 | exonic | nonsynonymous SNV | ENSSSCG000000044700 |
| 9 | 32127968 | 32127968 | exonic | nonsynonymous SNV | ENSSSCG00000009545  |
| 9 | 36296422 | 36296422 | exonic | nonsynonymous SNV | ENSSSCG000000031757 |
| 9 | 36862115 | 36862115 | exonic | nonsynonymous SNV | ENSSSCG000000055162 |
| 9 | 36866146 | 36866146 | exonic | nonsynonymous SNV | ENSSSCG000000017146 |
| 9 | 36893382 | 36893382 | exonic | nonsynonymous SNV | ENSSSCG000000031600 |
| 9 | 39059825 | 39059825 | exonic | nonsynonymous SNV | ENSSSCG000000021342 |
| 9 | 39878369 | 39878369 | exonic | nonsynonymous SNV | ENSSSCG000000017200 |
| 9 | 44729740 | 44729740 | exonic | nonsynonymous SNV | ENSSSCG000000055960 |
| 9 | 44882016 | 44882016 | exonic | nonsynonymous SNV | ENSSSCG000000062259 |
| 9 | 45804272 | 45804272 | exonic | nonsynonymous SNV | ENSSSCG000000023612 |
| 9 | 46151985 | 46151985 | exonic | nonsynonymous SNV | ENSSSCG000000023014 |
| 9 | 46153802 | 46153802 | exonic | nonsynonymous SNV | ENSSSCG000000024059 |
| 9 | 51127035 | 51127035 | exonic | nonsynonymous SNV | ENSSSCG000000035199 |
| 9 | 52078598 | 52078598 | exonic | nonsynonymous SNV | ENSSSCG000000017389 |
| 9 | 52084362 | 52084362 | exonic | nonsynonymous SNV | ENSSSCG000000021910 |
| 9 | 53362338 | 53362338 | exonic | nonsynonymous SNV | ENSSSCG000000033085 |
| 9 | 55743534 | 55743534 | exonic | nonsynonymous SNV | ENSSSCG000000032478 |
| 9 | 56919560 | 56919560 | exonic | nonsynonymous SNV | ENSSSCG000000017563 |
| 9 | 57149542 | 57149542 | exonic | nonsynonymous SNV | ENSSSCG000000017693 |
| 9 | 67649483 | 67649483 | exonic | nonsynonymous SNV | ENSSSCG000000026596 |

|    |           |           |        |                   |                    |
|----|-----------|-----------|--------|-------------------|--------------------|
| 9  | 68113776  | 68113776  | exonic | nonsynonymous SNV | ENSSSCG00000031292 |
| 9  | 69018337  | 69018337  | exonic | nonsynonymous SNV | ENSSSCG00000031114 |
| 9  | 72050632  | 72050632  | exonic | nonsynonymous SNV | ENSSSCG00000017717 |
| 9  | 73205605  | 73205605  | exonic | nonsynonymous SNV | ENSSSCG00000040177 |
| 9  | 74433021  | 74433021  | exonic | nonsynonymous SNV | ENSSSCG00000017753 |
| 9  | 76252061  | 76252061  | exonic | nonsynonymous SNV | ENSSSCG00000017755 |
| 9  | 77532125  | 77532125  | exonic | nonsynonymous SNV | ENSSSCG00000023478 |
| 9  | 77691779  | 77691779  | exonic | nonsynonymous SNV | ENSSSCG00000017795 |
| 9  | 77767212  | 77767212  | exonic | nonsynonymous SNV | ENSSSCG00000017799 |
| 9  | 78487756  | 78487756  | exonic | nonsynonymous SNV | ENSSSCG00000028078 |
| 9  | 81956240  | 81956240  | exonic | nonsynonymous SNV | ENSSSCG00000017832 |
| 9  | 82076533  | 82076533  | exonic | nonsynonymous SNV | ENSSSCG00000034858 |
| 9  | 82184489  | 82184489  | exonic | nonsynonymous SNV | ENSSSCG00000038664 |
| 9  | 90693731  | 90693731  | exonic | nonsynonymous SNV | ENSSSCG00000054106 |
| 9  | 90741238  | 90741238  | exonic | nonsynonymous SNV | ENSSSCG00000031932 |
| 9  | 91761901  | 91761901  | exonic | nonsynonymous SNV | ENSSSCG00000038683 |
| 9  | 92049198  | 92049198  | exonic | nonsynonymous SNV | ENSSSCG00000056589 |
| 9  | 93178676  | 93178676  | exonic | nonsynonymous SNV | ENSSSCG00000017868 |
| 9  | 93260496  | 93260496  | exonic | nonsynonymous SNV | ENSSSCG00000017869 |
| 9  | 105425107 | 105425107 | exonic | nonsynonymous SNV | ENSSSCG00000017873 |
| 9  | 105425107 | 105425107 | exonic | nonsynonymous SNV | ENSSSCG00000032049 |
| 9  | 105642779 | 105642779 | exonic | nonsynonymous SNV | ENSSSCG00000033819 |
| 9  | 107971963 | 107971963 | exonic | nonsynonymous SNV | ENSSSCG00000022026 |
| 9  | 109245504 | 109245504 | exonic | nonsynonymous SNV | ENSSSCG00000017897 |
| 9  | 113937983 | 113937983 | exonic | nonsynonymous SNV | ENSSSCG00000024584 |
| 9  | 117967142 | 117967142 | exonic | nonsynonymous SNV | ENSSSCG00000040188 |
| 9  | 121805292 | 121805292 | exonic | nonsynonymous SNV | ENSSSCG00000017962 |
| 9  | 123857108 | 123857108 | exonic | nonsynonymous SNV | ENSSSCG00000025345 |
| 9  | 124397331 | 124397331 | exonic | nonsynonymous SNV | ENSSSCG00000060339 |
| 9  | 127245411 | 127245411 | exonic | nonsynonymous SNV | ENSSSCG00000017983 |
| 9  | 131322858 | 131322858 | exonic | nonsynonymous SNV | ENSSSCG00000028788 |
| 10 | 6472313   | 6472313   | exonic | nonsynonymous SNV | ENSSSCG00000017998 |
| 10 | 10191122  | 10191122  | exonic | nonsynonymous SNV | ENSSSCG00000018005 |
| 10 | 11825456  | 11825456  | exonic | nonsynonymous SNV | ENSSSCG00000029441 |
| 10 | 11839527  | 11839527  | exonic | nonsynonymous SNV | ENSSSCG00000018023 |
| 10 | 18194206  | 18194206  | exonic | nonsynonymous SNV | ENSSSCG00000018039 |
| 10 | 19391571  | 19391571  | exonic | nonsynonymous SNV | ENSSSCG00000034364 |
| 10 | 20269177  | 20269177  | exonic | nonsynonymous SNV | ENSSSCG00000024030 |
| 10 | 23515475  | 23515475  | exonic | nonsynonymous SNV | ENSSSCG00000018046 |
| 10 | 24126467  | 24126467  | exonic | nonsynonymous SNV | ENSSSCG00000039961 |
| 10 | 24234218  | 24234218  | exonic | nonsynonymous SNV | ENSSSCG00000035839 |
| 10 | 24645694  | 24645694  | exonic | nonsynonymous SNV | ENSSSCG00000038164 |
| 10 | 31994324  | 31994324  | exonic | nonsynonymous SNV | ENSSSCG00000018055 |
| 10 | 32297131  | 32297131  | exonic | nonsynonymous SNV | ENSSSCG00000051348 |

|    |          |          |        |                   |                    |
|----|----------|----------|--------|-------------------|--------------------|
| 10 | 32440750 | 32440750 | exonic | nonsynonymous SNV | ENSSSCG00000011179 |
| 10 | 32700318 | 32700318 | exonic | nonsynonymous SNV | ENSSSCG00000011181 |
| 10 | 33025694 | 33025694 | exonic | nonsynonymous SNV | ENSSSCG00000011213 |
| 10 | 33317682 | 33317682 | exonic | nonsynonymous SNV | ENSSSCG00000011214 |
| 10 | 33902730 | 33902730 | exonic | nonsynonymous SNV | ENSSSCG00000039358 |
| 10 | 33902813 | 33902813 | exonic | nonsynonymous SNV | ENSSSCG00000025502 |
| 10 | 39535178 | 39535178 | exonic | nonsynonymous SNV | ENSSSCG00000011239 |
| 10 | 42967281 | 42967281 | exonic | nonsynonymous SNV | ENSSSCG00000011243 |
| 10 | 42987406 | 42987406 | exonic | nonsynonymous SNV | ENSSSCG00000011245 |
| 10 | 43929299 | 43929299 | exonic | nonsynonymous SNV | ENSSSCG00000025783 |
| 10 | 44543242 | 44543242 | exonic | nonsynonymous SNV | ENSSSCG00000034200 |
| 10 | 46235275 | 46235275 | exonic | nonsynonymous SNV | ENSSSCG00000039224 |
| 10 | 46949247 | 46949247 | exonic | nonsynonymous SNV | ENSSSCG00000027992 |
| 10 | 48407692 | 48407692 | exonic | nonsynonymous SNV | ENSSSCG00000011446 |
| 10 | 48719391 | 48719391 | exonic | nonsynonymous SNV | ENSSSCG00000011461 |
| 10 | 48719767 | 48719767 | exonic | nonsynonymous SNV | ENSSSCG00000011527 |
| 10 | 49388450 | 49388450 | exonic | nonsynonymous SNV | ENSSSCG00000011531 |
| 10 | 49866523 | 49866523 | exonic | nonsynonymous SNV | ENSSSCG00000023225 |
| 10 | 50663424 | 50663424 | exonic | nonsynonymous SNV | ENSSSCG00000011645 |
| 10 | 51960103 | 51960103 | exonic | nonsynonymous SNV | ENSSSCG00000011706 |
| 10 | 52509161 | 52509161 | exonic | nonsynonymous SNV | ENSSSCG00000029240 |
| 10 | 55161166 | 55161166 | exonic | nonsynonymous SNV | ENSSSCG00000011821 |
| 10 | 56288869 | 56288869 | exonic | nonsynonymous SNV | ENSSSCG00000035414 |
| 10 | 57234624 | 57234624 | exonic | nonsynonymous SNV | ENSSSCG00000011837 |
| 10 | 59774253 | 59774253 | exonic | nonsynonymous SNV | ENSSSCG00000023527 |
| 10 | 59853528 | 59853528 | exonic | nonsynonymous SNV | ENSSSCG00000011846 |
| 10 | 65459341 | 65459341 | exonic | nonsynonymous SNV | ENSSSCG00000011867 |
| 10 | 68663717 | 68663717 | exonic | nonsynonymous SNV | ENSSSCG00000037882 |
| 11 | 2408781  | 2408781  | exonic | nonsynonymous SNV | ENSSSCG00000025436 |
| 11 | 3883210  | 3883210  | exonic | nonsynonymous SNV | ENSSSCG00000058360 |
| 11 | 4977864  | 4977864  | exonic | nonsynonymous SNV | ENSSSCG00000022081 |
| 11 | 5194965  | 5194965  | exonic | nonsynonymous SNV | ENSSSCG00000011933 |
| 11 | 6199016  | 6199016  | exonic | nonsynonymous SNV | ENSSSCG00000011942 |
| 11 | 6199056  | 6199056  | exonic | nonsynonymous SNV | ENSSSCG00000030486 |
| 11 | 6199233  | 6199233  | exonic | nonsynonymous SNV | ENSSSCG00000060380 |
| 11 | 7359866  | 7359866  | exonic | nonsynonymous SNV | ENSSSCG00000029392 |
| 11 | 8613914  | 8613914  | exonic | nonsynonymous SNV | ENSSSCG00000012054 |
| 11 | 9690509  | 9690509  | exonic | nonsynonymous SNV | ENSSSCG00000012062 |
| 11 | 11448570 | 11448570 | exonic | nonsynonymous SNV | ENSSSCG00000021042 |
| 11 | 12718757 | 12718757 | exonic | nonsynonymous SNV | ENSSSCG00000012076 |
| 11 | 13770269 | 13770269 | exonic | nonsynonymous SNV | ENSSSCG00000025821 |
| 11 | 13960040 | 13960040 | exonic | nonsynonymous SNV | ENSSSCG00000029627 |
| 11 | 21091946 | 21091946 | exonic | nonsynonymous SNV | ENSSSCG00000025133 |
| 11 | 21293629 | 21293629 | exonic | nonsynonymous SNV | ENSSSCG00000033204 |

|    |          |          |        |                   |                     |
|----|----------|----------|--------|-------------------|---------------------|
| 11 | 25735462 | 25735462 | exonic | nonsynonymous SNV | ENSSSCG000000028559 |
| 11 | 45032994 | 45032994 | exonic | nonsynonymous SNV | ENSSSCG000000009638 |
| 11 | 46211232 | 46211232 | exonic | nonsynonymous SNV | ENSSSCG000000033037 |
| 11 | 52356374 | 52356374 | exonic | nonsynonymous SNV | ENSSSCG000000009659 |
| 11 | 55327968 | 55327968 | exonic | nonsynonymous SNV | ENSSSCG000000009664 |
| 11 | 56511546 | 56511546 | exonic | nonsynonymous SNV | ENSSSCG000000009683 |
| 11 | 76942020 | 76942020 | exonic | nonsynonymous SNV | ENSSSCG000000009685 |
| 11 | 77113800 | 77113800 | exonic | nonsynonymous SNV | ENSSSCG000000009691 |
| 11 | 77264991 | 77264991 | exonic | nonsynonymous SNV | ENSSSCG000000034740 |
| 12 | 2095660  | 2095660  | exonic | nonsynonymous SNV | ENSSSCG000000026044 |
| 12 | 2121452  | 2121452  | exonic | nonsynonymous SNV | ENSSSCG000000026659 |
| 12 | 2122932  | 2122932  | exonic | nonsynonymous SNV | ENSSSCG000000032475 |
| 12 | 2138210  | 2138210  | exonic | nonsynonymous SNV | ENSSSCG000000009705 |
| 12 | 2169770  | 2169770  | exonic | nonsynonymous SNV | ENSSSCG000000042965 |
| 12 | 3797515  | 3797515  | exonic | nonsynonymous SNV | ENSSSCG000000009720 |
| 12 | 5188158  | 5188158  | exonic | nonsynonymous SNV | ENSSSCG000000035929 |
| 12 | 5586801  | 5586801  | exonic | nonsynonymous SNV | ENSSSCG000000028018 |
| 12 | 11188060 | 11188060 | exonic | nonsynonymous SNV | ENSSSCG000000009781 |
| 12 | 14986623 | 14986623 | exonic | nonsynonymous SNV | ENSSSCG000000028889 |
| 12 | 15377777 | 15377777 | exonic | nonsynonymous SNV | ENSSSCG000000009796 |
| 12 | 19282248 | 19282248 | exonic | nonsynonymous SNV | ENSSSCG000000051618 |
| 12 | 19871937 | 19871937 | exonic | nonsynonymous SNV | ENSSSCG000000009814 |
| 12 | 19909431 | 19909431 | exonic | nonsynonymous SNV | ENSSSCG000000009873 |
| 12 | 20092602 | 20092602 | exonic | nonsynonymous SNV | ENSSSCG000000009874 |
| 12 | 20953590 | 20953590 | exonic | nonsynonymous SNV | ENSSSCG000000009876 |
| 12 | 21358760 | 21358760 | exonic | nonsynonymous SNV | ENSSSCG000000009881 |
| 12 | 23384108 | 23384108 | exonic | nonsynonymous SNV | ENSSSCG000000046640 |
| 12 | 26811471 | 26811471 | exonic | nonsynonymous SNV | ENSSSCG000000038099 |
| 12 | 38462027 | 38462027 | exonic | nonsynonymous SNV | ENSSSCG000000009896 |
| 12 | 39056439 | 39056439 | exonic | nonsynonymous SNV | ENSSSCG000000009901 |
| 12 | 39388346 | 39388346 | exonic | nonsynonymous SNV | ENSSSCG000000009912 |
| 12 | 39956800 | 39956800 | exonic | nonsynonymous SNV | ENSSSCG000000009957 |
| 12 | 40021784 | 40021784 | exonic | nonsynonymous SNV | ENSSSCG000000009968 |
| 12 | 40030795 | 40030795 | exonic | nonsynonymous SNV | ENSSSCG000000035836 |
| 12 | 41727598 | 41727598 | exonic | nonsynonymous SNV | ENSSSCG000000010077 |
| 12 | 44132776 | 44132776 | exonic | nonsynonymous SNV | ENSSSCG000000010086 |
| 12 | 44190802 | 44190802 | exonic | nonsynonymous SNV | ENSSSCG000000010089 |
| 12 | 44684331 | 44684331 | exonic | nonsynonymous SNV | ENSSSCG000000010092 |
| 12 | 46212558 | 46212558 | exonic | nonsynonymous SNV | ENSSSCG000000010093 |
| 12 | 46462337 | 46462337 | exonic | nonsynonymous SNV | ENSSSCG000000010097 |
| 12 | 48153994 | 48153994 | exonic | nonsynonymous SNV | ENSSSCG000000037762 |
| 12 | 48503465 | 48503465 | exonic | nonsynonymous SNV | ENSSSCG000000010139 |
| 12 | 48503735 | 48503735 | exonic | nonsynonymous SNV | ENSSSCG000000041446 |
| 12 | 48943486 | 48943486 | exonic | nonsynonymous SNV | ENSSSCG000000010145 |

|    |          |          |        |                   |                    |
|----|----------|----------|--------|-------------------|--------------------|
| 12 | 49103746 | 49103746 | exonic | nonsynonymous SNV | ENSSSCG00000010146 |
| 12 | 49379481 | 49379481 | exonic | nonsynonymous SNV | ENSSSCG00000010151 |
| 12 | 49389909 | 49389909 | exonic | nonsynonymous SNV | ENSSSCG00000033692 |
| 12 | 49390256 | 49390256 | exonic | nonsynonymous SNV | ENSSSCG00000034844 |
| 12 | 49390614 | 49390614 | exonic | nonsynonymous SNV | ENSSSCG00000060488 |
| 12 | 49523676 | 49523676 | exonic | nonsynonymous SNV | ENSSSCG00000010161 |
| 12 | 49544164 | 49544164 | exonic | nonsynonymous SNV | ENSSSCG00000010175 |
| 12 | 49786710 | 49786710 | exonic | nonsynonymous SNV | ENSSSCG00000023596 |
| 12 | 49830211 | 49830211 | exonic | nonsynonymous SNV | ENSSSCG00000010212 |
| 12 | 49929164 | 49929164 | exonic | nonsynonymous SNV | ENSSSCG00000028327 |
| 12 | 50108214 | 50108214 | exonic | nonsynonymous SNV | ENSSSCG00000058274 |
| 12 | 50728045 | 50728045 | exonic | nonsynonymous SNV | ENSSSCG00000010219 |
| 12 | 50915637 | 50915637 | exonic | nonsynonymous SNV | ENSSSCG00000031360 |
| 12 | 51816884 | 51816884 | exonic | nonsynonymous SNV | ENSSSCG00000010226 |
| 12 | 52729807 | 52729807 | exonic | nonsynonymous SNV | ENSSSCG00000036480 |
| 12 | 52843265 | 52843265 | exonic | nonsynonymous SNV | ENSSSCG00000029311 |
| 12 | 53105973 | 53105973 | exonic | nonsynonymous SNV | ENSSSCG00000010239 |
| 12 | 53237427 | 53237427 | exonic | nonsynonymous SNV | ENSSSCG00000010241 |
| 12 | 53335068 | 53335068 | exonic | nonsynonymous SNV | ENSSSCG00000010266 |
| 12 | 53366056 | 53366056 | exonic | nonsynonymous SNV | ENSSSCG00000036446 |
| 12 | 53366191 | 53366191 | exonic | nonsynonymous SNV | ENSSSCG00000010273 |
| 12 | 53405835 | 53405835 | exonic | nonsynonymous SNV | ENSSSCG00000010280 |
| 12 | 54725816 | 54725816 | exonic | nonsynonymous SNV | ENSSSCG00000010278 |
| 12 | 55146905 | 55146905 | exonic | nonsynonymous SNV | ENSSSCG00000010281 |
| 12 | 55267170 | 55267170 | exonic | nonsynonymous SNV | ENSSSCG00000010293 |
| 12 | 58098834 | 58098834 | exonic | nonsynonymous SNV | ENSSSCG00000050482 |
| 12 | 59333975 | 59333975 | exonic | nonsynonymous SNV | ENSSSCG00000010316 |
| 12 | 59556313 | 59556313 | exonic | nonsynonymous SNV | ENSSSCG00000048472 |
| 12 | 59758107 | 59758107 | exonic | nonsynonymous SNV | ENSSSCG00000010331 |
| 12 | 59988473 | 59988473 | exonic | nonsynonymous SNV | ENSSSCG00000010379 |
| 12 | 60161027 | 60161027 | exonic | nonsynonymous SNV | ENSSSCG00000010401 |
| 12 | 60465514 | 60465514 | exonic | nonsynonymous SNV | ENSSSCG00000010461 |
| 12 | 60762244 | 60762244 | exonic | nonsynonymous SNV | ENSSSCG00000035635 |
| 12 | 60908868 | 60908868 | exonic | nonsynonymous SNV | ENSSSCG00000010476 |
| 12 | 61501287 | 61501287 | exonic | nonsynonymous SNV | ENSSSCG00000010480 |
| 13 | 985006   | 985006   | exonic | nonsynonymous SNV | ENSSSCG00000061845 |
| 13 | 985156   | 985156   | exonic | nonsynonymous SNV | ENSSSCG00000059716 |
| 13 | 1432339  | 1432339  | exonic | nonsynonymous SNV | ENSSSCG00000010513 |
| 13 | 12511022 | 12511022 | exonic | nonsynonymous SNV | ENSSSCG00000038904 |
| 13 | 12639988 | 12639988 | exonic | nonsynonymous SNV | ENSSSCG00000010514 |
| 13 | 19043522 | 19043522 | exonic | nonsynonymous SNV | ENSSSCG00000010528 |
| 13 | 21872625 | 21872625 | exonic | nonsynonymous SNV | ENSSSCG00000010538 |
| 13 | 22016331 | 22016331 | exonic | nonsynonymous SNV | ENSSSCG00000010541 |
| 13 | 22018884 | 22018884 | exonic | nonsynonymous SNV | ENSSSCG00000006165 |

|    |           |           |        |                   |                    |
|----|-----------|-----------|--------|-------------------|--------------------|
| 13 | 22206432  | 22206432  | exonic | nonsynonymous SNV | ENSSSCG00000010575 |
| 13 | 22207938  | 22207938  | exonic | nonsynonymous SNV | ENSSSCG00000010577 |
| 13 | 22387419  | 22387419  | exonic | nonsynonymous SNV | ENSSSCG00000038856 |
| 13 | 24654154  | 24654154  | exonic | nonsynonymous SNV | ENSSSCG00000010595 |
| 13 | 26099458  | 26099458  | exonic | nonsynonymous SNV | ENSSSCG00000010607 |
| 13 | 30387599  | 30387599  | exonic | nonsynonymous SNV | ENSSSCG00000032968 |
| 13 | 32417200  | 32417200  | exonic | nonsynonymous SNV | ENSSSCG00000010651 |
| 13 | 34857100  | 34857100  | exonic | nonsynonymous SNV | ENSSSCG00000038222 |
| 13 | 36876959  | 36876959  | exonic | nonsynonymous SNV | ENSSSCG00000010681 |
| 13 | 59636740  | 59636740  | exonic | nonsynonymous SNV | ENSSSCG00000010688 |
| 13 | 60916305  | 60916305  | exonic | nonsynonymous SNV | ENSSSCG00000010698 |
| 13 | 68213577  | 68213577  | exonic | nonsynonymous SNV | ENSSSCG00000037530 |
| 13 | 75704472  | 75704472  | exonic | nonsynonymous SNV | ENSSSCG00000010717 |
| 13 | 90010632  | 90010632  | exonic | nonsynonymous SNV | ENSSSCG00000032174 |
| 13 | 117290252 | 117290252 | exonic | nonsynonymous SNV | ENSSSCG00000016399 |
| 13 | 117309598 | 117309598 | exonic | nonsynonymous SNV | ENSSSCG00000016395 |
| 13 | 130501208 | 130501208 | exonic | nonsynonymous SNV | ENSSSCG00000040172 |
| 13 | 132269387 | 132269387 | exonic | nonsynonymous SNV | ENSSSCG00000015741 |
| 13 | 133108032 | 133108032 | exonic | nonsynonymous SNV | ENSSSCG00000015748 |
| 13 | 133472575 | 133472575 | exonic | nonsynonymous SNV | ENSSSCG00000021938 |
| 13 | 133868825 | 133868825 | exonic | nonsynonymous SNV | ENSSSCG00000015898 |
| 13 | 136689548 | 136689548 | exonic | nonsynonymous SNV | ENSSSCG00000025598 |
| 13 | 136696142 | 136696142 | exonic | nonsynonymous SNV | ENSSSCG00000027516 |
| 13 | 136726657 | 136726657 | exonic | nonsynonymous SNV | ENSSSCG00000015965 |
| 13 | 136726696 | 136726696 | exonic | nonsynonymous SNV | ENSSSCG00000016017 |
| 13 | 136727247 | 136727247 | exonic | nonsynonymous SNV | ENSSSCG00000060494 |
| 13 | 136727481 | 136727481 | exonic | nonsynonymous SNV | ENSSSCG00000016042 |
| 13 | 138239941 | 138239941 | exonic | nonsynonymous SNV | ENSSSCG00000016159 |
| 13 | 138544251 | 138544251 | exonic | nonsynonymous SNV | ENSSSCG00000016177 |
| 13 | 140745625 | 140745625 | exonic | nonsynonymous SNV | ENSSSCG00000016218 |
| 13 | 147811170 | 147811170 | exonic | nonsynonymous SNV | ENSSSCG00000023935 |
| 13 | 148579051 | 148579051 | exonic | nonsynonymous SNV | ENSSSCG00000048588 |
| 13 | 151484178 | 151484178 | exonic | nonsynonymous SNV | ENSSSCG00000050847 |
| 13 | 158669811 | 158669811 | exonic | nonsynonymous SNV | ENSSSCG00000009432 |
| 13 | 160455193 | 160455193 | exonic | nonsynonymous SNV | ENSSSCG00000036274 |
| 13 | 195645147 | 195645147 | exonic | nonsynonymous SNV | ENSSSCG00000016317 |
| 13 | 199940260 | 199940260 | exonic | nonsynonymous SNV | ENSSSCG00000016335 |
| 13 | 200786162 | 200786162 | exonic | nonsynonymous SNV | ENSSSCG00000016342 |
| 13 | 202813306 | 202813306 | exonic | nonsynonymous SNV | ENSSSCG00000024777 |
| 13 | 204805453 | 204805453 | exonic | nonsynonymous SNV | ENSSSCG00000036261 |
| 13 | 205250768 | 205250768 | exonic | nonsynonymous SNV | ENSSSCG00000026842 |
| 13 | 207028168 | 207028168 | exonic | nonsynonymous SNV | ENSSSCG00000016809 |
| 13 | 207528536 | 207528536 | exonic | nonsynonymous SNV | ENSSSCG00000031509 |
| 14 | 3403522   | 3403522   | exonic | nonsynonymous SNV | ENSSSCG00000016821 |



|    |          |          |        |                   |                    |
|----|----------|----------|--------|-------------------|--------------------|
| 14 | 4354665  | 4354665  | exonic | nonsynonymous SNV | ENSSSCG00000016843 |
| 14 | 7241987  | 7241987  | exonic | nonsynonymous SNV | ENSSSCG00000016846 |
| 14 | 7706553  | 7706553  | exonic | nonsynonymous SNV | ENSSSCG00000016856 |
| 14 | 10423719 | 10423719 | exonic | nonsynonymous SNV | ENSSSCG00000016916 |
| 14 | 11169354 | 11169354 | exonic | nonsynonymous SNV | ENSSSCG00000016956 |
| 14 | 12899844 | 12899844 | exonic | nonsynonymous SNV | ENSSSCG00000037053 |
| 14 | 12899889 | 12899889 | exonic | nonsynonymous SNV | ENSSSCG00000027293 |
| 14 | 12917822 | 12917822 | exonic | nonsynonymous SNV | ENSSSCG00000016989 |
| 14 | 13728056 | 13728056 | exonic | nonsynonymous SNV | ENSSSCG00000035845 |
| 14 | 13914747 | 13914747 | exonic | nonsynonymous SNV | ENSSSCG00000017010 |
| 14 | 14952003 | 14952003 | exonic | nonsynonymous SNV | ENSSSCG00000017053 |
| 14 | 14967285 | 14967285 | exonic | nonsynonymous SNV | ENSSSCG00000043071 |
| 14 | 15305511 | 15305511 | exonic | nonsynonymous SNV | ENSSSCG00000017076 |
| 14 | 15888390 | 15888390 | exonic | nonsynonymous SNV | ENSSSCG00000017078 |
| 14 | 16736676 | 16736676 | exonic | nonsynonymous SNV | ENSSSCG00000017084 |
| 14 | 19031314 | 19031314 | exonic | nonsynonymous SNV | ENSSSCG00000017091 |
| 14 | 21108681 | 21108681 | exonic | nonsynonymous SNV | ENSSSCG00000017109 |
| 14 | 21136392 | 21136392 | exonic | nonsynonymous SNV | ENSSSCG00000003935 |
| 14 | 22417681 | 22417681 | exonic | nonsynonymous SNV | ENSSSCG00000049115 |
| 14 | 23298701 | 23298701 | exonic | nonsynonymous SNV | ENSSSCG00000007147 |
| 14 | 29871856 | 29871856 | exonic | nonsynonymous SNV | ENSSSCG00000007146 |
| 14 | 29963038 | 29963038 | exonic | nonsynonymous SNV | ENSSSCG00000007145 |
| 14 | 30541699 | 30541699 | exonic | nonsynonymous SNV | ENSSSCG00000007171 |
| 14 | 30874440 | 30874440 | exonic | nonsynonymous SNV | ENSSSCG00000007199 |
| 14 | 31289343 | 31289343 | exonic | nonsynonymous SNV | ENSSSCG00000038183 |
| 14 | 38561130 | 38561130 | exonic | nonsynonymous SNV | ENSSSCG00000007231 |
| 14 | 38615828 | 38615828 | exonic | nonsynonymous SNV | ENSSSCG00000056065 |
| 14 | 38656446 | 38656446 | exonic | nonsynonymous SNV | ENSSSCG00000007249 |
| 14 | 38828836 | 38828836 | exonic | nonsynonymous SNV | ENSSSCG00000026137 |
| 14 | 38851944 | 38851944 | exonic | nonsynonymous SNV | ENSSSCG00000024787 |
| 14 | 38852924 | 38852924 | exonic | nonsynonymous SNV | ENSSSCG00000007261 |
| 14 | 39844713 | 39844713 | exonic | nonsynonymous SNV | ENSSSCG00000007280 |
| 14 | 40098623 | 40098623 | exonic | nonsynonymous SNV | ENSSSCG00000007288 |
| 14 | 40295507 | 40295507 | exonic | nonsynonymous SNV | ENSSSCG00000023261 |
| 14 | 40523795 | 40523795 | exonic | nonsynonymous SNV | ENSSSCG00000021138 |
| 14 | 43538998 | 43538998 | exonic | nonsynonymous SNV | ENSSSCG00000057781 |
| 14 | 45924888 | 45924888 | exonic | nonsynonymous SNV | ENSSSCG00000022714 |
| 14 | 49802280 | 49802280 | exonic | nonsynonymous SNV | ENSSSCG00000021861 |
| 14 | 49803897 | 49803897 | exonic | nonsynonymous SNV | ENSSSCG00000007428 |
| 14 | 49960140 | 49960140 | exonic | nonsynonymous SNV | ENSSSCG00000007435 |
| 14 | 50256952 | 50256952 | exonic | nonsynonymous SNV | ENSSSCG00000007458 |
| 14 | 50257442 | 50257442 | exonic | nonsynonymous SNV | ENSSSCG00000058830 |
| 14 | 50326583 | 50326583 | exonic | nonsynonymous SNV | ENSSSCG00000007501 |
| 14 | 50327021 | 50327021 | exonic | nonsynonymous SNV | ENSSSCG00000007522 |

|    |          |          |        |                   |                     |
|----|----------|----------|--------|-------------------|---------------------|
| 14 | 50327039 | 50327039 | exonic | nonsynonymous SNV | ENSSSCG00000007526  |
| 14 | 50405763 | 50405763 | exonic | nonsynonymous SNV | ENSSSCG00000007531  |
| 14 | 50430733 | 50430733 | exonic | nonsynonymous SNV | ENSSSCG000000033946 |
| 14 | 50453733 | 50453733 | exonic | nonsynonymous SNV | ENSSSCG000000039212 |
| 14 | 50586649 | 50586649 | exonic | nonsynonymous SNV | ENSSSCG000000044842 |
| 14 | 51296292 | 51296292 | exonic | nonsynonymous SNV | ENSSSCG000000055167 |
| 14 | 51519932 | 51519932 | exonic | nonsynonymous SNV | ENSSSCG000000016436 |
| 14 | 51970632 | 51970632 | exonic | nonsynonymous SNV | ENSSSCG000000025737 |
| 14 | 54862733 | 54862733 | exonic | nonsynonymous SNV | ENSSSCG000000032249 |
| 14 | 54874654 | 54874654 | exonic | nonsynonymous SNV | ENSSSCG000000016475 |
| 14 | 55499797 | 55499797 | exonic | nonsynonymous SNV | ENSSSCG000000032495 |
| 14 | 55514997 | 55514997 | exonic | nonsynonymous SNV | ENSSSCG000000016487 |
| 14 | 55807343 | 55807343 | exonic | nonsynonymous SNV | ENSSSCG000000034639 |
| 14 | 55820984 | 55820984 | exonic | nonsynonymous SNV | ENSSSCG000000028394 |
| 14 | 56014462 | 56014462 | exonic | nonsynonymous SNV | ENSSSCG000000016489 |
| 14 | 56751401 | 56751401 | exonic | nonsynonymous SNV | ENSSSCG000000016517 |
| 14 | 59204776 | 59204776 | exonic | nonsynonymous SNV | ENSSSCG000000027118 |
| 14 | 61001679 | 61001679 | exonic | nonsynonymous SNV | ENSSSCG000000016535 |
| 14 | 63586407 | 63586407 | exonic | nonsynonymous SNV | ENSSSCG000000016548 |
| 14 | 64345024 | 64345024 | exonic | nonsynonymous SNV | ENSSSCG000000016549 |
| 14 | 64727878 | 64727878 | exonic | nonsynonymous SNV | ENSSSCG000000016579 |
| 14 | 65592959 | 65592959 | exonic | nonsynonymous SNV | ENSSSCG000000016592 |
| 14 | 66278754 | 66278754 | exonic | nonsynonymous SNV | ENSSSCG000000016608 |
| 14 | 66676106 | 66676106 | exonic | nonsynonymous SNV | ENSSSCG000000016609 |
| 14 | 66678011 | 66678011 | exonic | nonsynonymous SNV | ENSSSCG000000025602 |
| 14 | 66683095 | 66683095 | exonic | nonsynonymous SNV | ENSSSCG000000016665 |
| 14 | 69570049 | 69570049 | exonic | nonsynonymous SNV | ENSSSCG000000016682 |
| 14 | 71386895 | 71386895 | exonic | nonsynonymous SNV | ENSSSCG000000016708 |
| 14 | 71512939 | 71512939 | exonic | nonsynonymous SNV | ENSSSCG000000033313 |
| 14 | 71811682 | 71811682 | exonic | nonsynonymous SNV | ENSSSCG000000016715 |
| 14 | 73183890 | 73183890 | exonic | nonsynonymous SNV | ENSSSCG000000016725 |
| 14 | 73457091 | 73457091 | exonic | nonsynonymous SNV | ENSSSCG000000016751 |
| 14 | 73691339 | 73691339 | exonic | nonsynonymous SNV | ENSSSCG000000040257 |
