# Supplementary material for: Identification of Breed-Specific SNPs of Danish Large White Pig in Comparison with Four Chinese Local Pig Breed Genomes
Source: MDPI journal article supplement (doi:10.3390/genes15050623), 2024-05-14
Supplement: s1 [file s1]

Supplementary Table S1 The re-sequencing information of 103 samples

| Sample | Clean_Reads_Num | HQ_Clean_Reads_Num(%) | Mapped_Reads    | 1X(%) |
|--------|-----------------|-----------------------|-----------------|-------|
| LW1    | 100145006       | 100012148(99.87%)     | 98249986-98.24% | 95.96 |
| LW2    | 100004854       | 99844212(99.84%)      | 93968700-94.12% | 95.74 |
| LW3    | 100271988       | 100111900(99.84%)     | 98883904-98.77% | 96.04 |
| LW4    | 100031814       | 99913326(99.88%)      | 98370766-98.46% | 95.92 |
| LW5    | 100223730       | 100069112(99.85%)     | 98047919-97.98% | 96.05 |
| LW6    | 100404970       | 100249566(99.85%)     | 99058854-98.81% | 96.38 |
| LW7    | 100139818       | 99966984(99.83%)      | 98844351-98.88% | 96.12 |
| LW8    | 100031342       | 99876330(99.85%)      | 98507766-98.63% | 96.13 |
| LW9    | 97829054        | 97671528(99.84%)      | 92028626-94.22% | 95.6  |
| LW10   | 94668472        | 94547416(99.87%)      | 93374882-98.76% | 95.81 |
| LW11   | 90197036        | 90045946(99.83%)      | 88420880-98.20% | 95.62 |
| LW12   | 100279742       | 100117072(99.84%)     | 99043417-98.93% | 96.22 |
| LW13   | 95032388        | 94863994(99.82%)      | 93762602-98.84% | 95.86 |
| LW14   | 100162980       | 99984746(99.82%)      | 98537220-98.55% | 96.13 |
| LW15   | 100202530       | 100079894(99.88%)     | 98777787-98.70% | 96.12 |
| LW16   | 100274904       | 100102414(99.83%)     | 99041479-98.94% | 96.09 |
| LW17   | 100295902       | 100143062(99.85%)     | 99131714-98.99% | 96.19 |
| LW18   | 100062858       | 99900212(99.84%)      | 98835307-98.93% | 96.11 |
| LW19   | 100289298       | 100144302(99.86%)     | 98869282-98.73% | 96.07 |
| LW20   | 100175600       | 100009288(99.83%)     | 98931110-98.92% | 96.2  |
| LW21   | 100263266       | 100084598(99.82%)     | 98572828-98.49% | 96.03 |
| LW22   | 100132912       | 99967470(99.83%)      | 95783952-95.82% | 96.01 |
| LW23   | 100063784       | 99927290(99.86%)      | 95001728-95.07% | 95.94 |
| LW24   | 100252456       | 100122204(99.87%)     | 98890364-98.77% | 96.08 |
| LW25   | 100085222       | 99925476(99.84%)      | 96623431-96.70% | 96.16 |
| LW26   | 100228870       | 100085938(99.86%)     | 98705193-98.62% | 96.18 |
| LW27   | 100051982       | 99883412(99.83%)      | 98623277-98.74% | 96.18 |
| LW28   | 100287582       | 100111174(99.82%)     | 95066708-94.96% | 96.04 |
| LW29   | 100301432       | 100163678(99.86%)     | 98940398-98.78% | 96.05 |
| LW30   | 100022644       | 99852342(99.83%)      | 98366315-98.51% | 96.07 |
| LW31   | 100113286       | 99926554(99.81%)      | 98777200-98.85% | 96.17 |
| LW32   | 98422122        | 98246008(99.82%)      | 97061748-98.79% | 96.42 |
| LW33   | 95998206        | 95868934(99.87%)      | 94711741-98.79% | 96.09 |
| LW34   | 98487222        | 98342860(99.85%)      | 97251170-98.89% | 96.22 |
| LW35   | 100285016       | 100111138(99.83%)     | 98354131-98.24% | 96.07 |
| LW36   | 100076922       | 99906294(99.83%)      | 98333502-98.43% | 96.01 |
| LW37   | 84600520        | 84478270(99.86%)      | 83578484-98.93% | 95.27 |
| LW38   | 100179980       | 100019420(99.84%)     | 98982825-98.96% | 96.18 |
| LW39   | 81292344        | 81131762(99.8%)       | 78319179-96.53% | 94.85 |
| LW40   | 95300284        | 95114098(99.8%)       | 93890283-98.71% | 95.93 |
| LW41   | 100022644       | 99851688(99.83%)      | 88539556-88.67% | 95.49 |
| LW42   | 85393862        | 85242978(99.82%)      | 79202392-92.91% | 94.67 |

|         |           |                   |                 |       |
|---------|-----------|-------------------|-----------------|-------|
| LW43    | 100176394 | 99981268(99.81%)  | 98961515-98.98% | 96.13 |
| AQ-10   | 100500000 | 99859148(99.36%)  | 98500977-98.64% | 95.86 |
| AQ-11   | 100500000 | 99862368(99.37%)  | 98395356-98.53% | 95.65 |
| AQ-1    | 100500000 | 99712540(99.22%)  | 97297406-97.58% | 96.01 |
| AQ-12   | 100500000 | 99826270(99.33%)  | 97292832-97.46% | 95.56 |
| AQ-13   | 100500000 | 99918804(99.42%)  | 86803568-86.87% | 94.48 |
| AQ-14   | 100500000 | 99833914(99.34%)  | 97875535-98.04% | 95.86 |
| AQ-15   | 100500000 | 99874596(99.38%)  | 98016190-98.14% | 95.87 |
| AQ-16   | 100500000 | 99855404(99.36%)  | 98422603-98.57% | 95.87 |
| AQ-17   | 100500000 | 99863802(99.37%)  | 98294565-98.43% | 95.83 |
| AQ-18   | 100500000 | 99852006(99.36%)  | 98433633-98.58% | 95.79 |
| AQ-19   | 100500000 | 99831288(99.33%)  | 98093599-98.26% | 95.76 |
| AQ-20   | 100500000 | 99860366(99.36%)  | 95896041-96.03% | 95.45 |
| AQ-21   | 100500000 | 99891772(99.39%)  | 98086955-98.19% | 95.68 |
| AQ-2    | 100500000 | 99746388(99.25%)  | 97815564-98.06% | 95.43 |
| AQ-22   | 100500000 | 99834056(99.34%)  | 97884927-98.05% | 95.52 |
| AQ-23   | 100500000 | 99870772(99.37%)  | 97894163-98.02% | 95.81 |
| AQ-24   | 100500000 | 99846464(99.35%)  | 98476373-98.63% | 95.49 |
| AQ-3    | 100500000 | 99818494(99.32%)  | 98138533-98.32% | 95.69 |
| AQ-4    | 100500000 | 99744838(99.25%)  | 98220416-98.47% | 95.95 |
| AQ-5    | 100500000 | 99779358(99.28%)  | 98341323-98.56% | 95.83 |
| AQ-6    | 100500000 | 99771034(99.27%)  | 96264168-96.49% | 95.74 |
| AQ-7    | 100500000 | 99783148(99.29%)  | 95762957-95.97% | 95.99 |
| AQ-8    | 100500000 | 99752178(99.26%)  | 97939052-98.18% | 95.44 |
| AQ-9    | 100500000 | 99774974(99.28%)  | 98073241-98.29% | 96.13 |
| DN005A  | 91983464  | 91792860(99.79%)  | 90887732-99.01% | 95.59 |
| DN007A  | 100103810 | 99953142(99.85%)  | 98949316-99.00% | 95.8  |
| DN010A  | 92264980  | 92072954(99.79%)  | 91227355-99.08% | 95.53 |
| DN016A  | 100085752 | 99887592(99.8%)   | 98968704-99.08% | 95.9  |
| DN021A  | 100310090 | 100134284(99.82%) | 98905311-98.77% | 95.96 |
| DN025A  | 100219868 | 100063460(99.84%) | 99178292-99.12% | 96.01 |
| DN030A  | 86953114  | 86771432(99.79%)  | 85850098-98.94% | 95.3  |
| DN034A  | 100309100 | 100124670(99.82%) | 99243291-99.12% | 95.98 |
| DN040A  | 85036454  | 84838896(99.77%)  | 83997100-99.01% | 95    |
| DN052A  | 85204456  | 85045984(99.81%)  | 84343235-99.17% | 95.32 |
| DN054A  | 98018144  | 97810174(99.79%)  | 96916687-99.09% | 95.87 |
| DN056A  | 94424454  | 94255572(99.82%)  | 93490773-99.19% | 95.93 |
| DN061A  | 100055978 | 99854132(99.8%)   | 98801558-98.95% | 95.98 |
| DN087A  | 100251618 | 100029288(99.78%) | 99040850-99.01% | 95.89 |
| DN093A  | 100133622 | 99941526(99.81%)  | 99009639-99.07% | 95.89 |
| DQZ013A | 85195400  | 84969114(99.73%)  | 83668611-98.47% | 93.74 |
| DQZ018A | 85050836  | 84888284(99.81%)  | 84085624-99.05% | 95.19 |
| DQZ019A | 91904950  | 91725344(99.8%)   | 90811325-99.00% | 95.6  |
| DQZ020A | 100295660 | 100086656(99.79%) | 99031743-98.95% | 96.02 |

|         |           |                   |                 |       |
|---------|-----------|-------------------|-----------------|-------|
| DQZ021A | 100039410 | 99903842(99.86%)  | 98898315-98.99% | 95.78 |
| DQZ023A | 100200918 | 100038290(99.84%) | 99084461-99.05% | 96    |
| DQZ024A | 100313330 | 100117048(99.8%)  | 98989211-98.87% | 96    |
| DQZ028A | 100011228 | 99830944(99.82%)  | 98903014-99.07% | 96.03 |
| DQZ029A | 100028524 | 99843706(99.82%)  | 98895188-99.05% | 96.09 |
| DQZ030A | 81479658  | 81307172(99.79%)  | 80551285-99.07% | 94.87 |
| DQZ031A | 100298944 | 100144978(99.85%) | 99190326-99.05% | 95.93 |
| DQZ032A | 88733398  | 88589140(99.84%)  | 87860192-99.18% | 95.35 |
| DQZ033A | 100273900 | 100089494(99.82%) | 98726199-98.64% | 96    |
| DQZ034A | 98374750  | 98185356(99.81%)  | 97308356-99.11% | 95.94 |
| DQZ052A | 100006854 | 99858462(99.85%)  | 98916143-99.06% | 95.98 |
| SS-1    | 100500000 | 99656566(99.16%)  | 96721619-97.05% | 95.75 |
| SS-2    | 100500000 | 99525884(99.03%)  | 97588464-98.05% | 95.67 |
| SS-3    | 100500000 | 99671074(99.18%)  | 97645148-97.97% | 95.91 |
| SS-4    | 100500000 | 99518172(99.02%)  | 97730232-98.20% | 95.66 |
| SS-5    | 100500000 | 99611532(99.12%)  | 97693212-98.07% | 95.78 |
| SS-6    | 100500000 | 99550936(99.06%)  | 97805955-98.25% | 95.91 |
